# Supplementary material for: Proteomics Coupled with Metabolite and Cell Wall Profiling Reveal Metabolic Processes of a Developing Rice Stem Internode
Source: Front Plant Sci. 2017 Jul 13;8:1134. doi: 10.3389/fpls.2017.01134 (PMC5507963; doi:10.3389/fpls.2017.01134)
Supplement: Supplementary file 4 [file Table4.XLSX]

## Sheet: KO identification
Table S4. KEGG ontology analysis of identified proteins in the elongating internode II.
Locus ID	KO ID	KO definition
LOC_Os03g06620	K08967	1,2-dihydroxy-3-keto-5-methylthiopentene dioxygenase [EC:1.13.11.53
LOC_Os08g35740	K05894	12-oxophytodienoic acid reductase [EC:1.3.1.42]
LOC_Os03g50290	K06630	tyrosine 3-monooxygenase/tryptophan 5-monooxygenase activation
LOC_Os02g53180	K05933	aminocyclopropanecarboxylate oxidase [EC:1.14.17.4]
LOC_Os01g39860	K05933	aminocyclopropanecarboxylate oxidase [EC:1.14.17.4]
LOC_Os01g01710	K00099	1-deoxy-D-xylulose-5-phosphate reductoisomerase [EC:1.1.1.267]
LOC_Os01g60190	K01834	phosphoglycerate mutase [EC:5.4.2.1]
LOC_Os05g40420	K01834	phosphoglycerate mutase [EC:5.4.2.1]
LOC_Os07g49150	K03062	26S proteasome regulatory subunit T2
LOC_Os03g18690	K03062	26S proteasome regulatory subunit T2
LOC_Os02g56000	K03065	26S proteasome regulatory subunit T5
LOC_Os06g07630	K03065	26S proteasome regulatory subunit T5
LOC_Os02g21970	K03063	26S proteasome regulatory subunit T3
LOC_Os06g40560	K03064	26S proteasome regulatory subunit T4
LOC_Os02g11050	K03066	26S proteasome regulatory subunit T6
LOC_Os08g43640	K03033	26S proteasome regulatory subunit N3
LOC_Os03g13970	K03029	26S proteasome regulatory subunit N10
LOC_Os07g25420	K03031	26S proteasome regulatory subunit N12
LOC_Os09g25310	K06693	26S proteasome non-ATPase regulatory subunit 9
LOC_Os12g10784	K01627	2-dehydro-3-deoxyphosphooctonate aldolase (KDO 8-P synthase)
LOC_Os03g50540	K03934	NADH dehydrogenase (ubiquinone) Fe-S protein 1 [EC:1.6.5.3 1.6.99.3]
LOC_Os07g22720	K00627	pyruvate dehydrogenase E2 component (dihydrolipoamide
LOC_Os02g01500	K00627	pyruvate dehydrogenase E2 component (dihydrolipoamide
LOC_Os06g01630	K00627	pyruvate dehydrogenase E2 component (dihydrolipoamide
LOC_Os06g30460	K00627	pyruvate dehydrogenase E2 component (dihydrolipoamide
LOC_Os12g08170	K00627	pyruvate dehydrogenase E2 component (dihydrolipoamide
LOC_Os01g21160	K09699	2-oxoisovalerate dehydrogenase E2 component (dihydrolipoyl
LOC_Os04g32020	K00164	2-oxoglutarate dehydrogenase E1 component [EC:1.2.4.2]
LOC_Os07g49520	K00164	2-oxoglutarate dehydrogenase E1 component [EC:1.2.4.2]
LOC_Os09g36800	K01735	3-dehydroquinate synthase [EC:4.2.3.4]
LOC_Os05g48750	K00979	3-deoxy-manno-octulosonate cytidylyltransferase (CMP-KDO synthetase)
LOC_Os01g24680	K10527	enoyl-CoA hydratase/3-hydroxyacyl-CoA dehydrogenase [EC:4.2.1.17
LOC_Os02g17390	K10527	enoyl-CoA hydratase/3-hydroxyacyl-CoA dehydrogenase [EC:4.2.1.17
LOC_Os02g03260	K01703	3-isopropylmalate/(R)-2-methylmalate dehydratase large subunit
LOC_Os02g43830	K01704	3-isopropylmalate/(R)-2-methylmalate dehydratase small subunit
LOC_Os02g57260	K07513	acetyl-CoA acyltransferase 1 [EC:2.3.1.16]
LOC_Os04g30760	K00059	3-oxoacyl-[acyl-carrier protein] reductase [EC:1.1.1.100]
LOC_Os04g55060	K00648	3-oxoacyl-[acyl-carrier-protein] synthase III [EC:2.3.1.180]
LOC_Os07g42420	K09458	3-oxoacyl-[acyl-carrier-protein] synthase II [EC:2.3.1.179]
LOC_Os06g04280	K00800	3-phosphoshikimate 1-carboxyvinyltransferase [EC:2.5.1.19]
LOC_Os01g73160	K02947	small subunit ribosomal protein S10e
LOC_Os08g02410	K02953	small subunit ribosomal protein S13e
LOC_Os10g27190	K02962	small subunit ribosomal protein S17e
LOC_Os03g01900	K02962	small subunit ribosomal protein S17e
LOC_Os05g39960	K02976	small subunit ribosomal protein S26e
LOC_Os01g60790	K02976	small subunit ribosomal protein S26e
LOC_Os03g38000	K02985	small subunit ribosomal protein S3e
LOC_Os07g41750	K02985	small subunit ribosomal protein S3e
LOC_Os02g01560	K02987	small subunit ribosomal protein S4e
LOC_Os01g25610	K02987	small subunit ribosomal protein S4e
LOC_Os05g30530	K02987	small subunit ribosomal protein S4e
LOC_Os03g27260	K02991	small subunit ribosomal protein S6e
LOC_Os07g42950	K02991	small subunit ribosomal protein S6e
LOC_Os05g27940	K02993	small subunit ribosomal protein S7e
LOC_Os07g43390	K00705	4-alpha-glucanotransferase [EC:2.4.1.25]
LOC_Os07g46790	K00705	4-alpha-glucanotransferase [EC:2.4.1.25]
LOC_Os03g56300	K03941	NADH dehydrogenase (ubiquinone) Fe-S protein 8 [EC:1.6.5.3 1.6.99.3]
LOC_Os03g52170	K03527	4-hydroxy-3-methylbut-2-enyl diphosphate reductase [EC:1.17.1.2]
LOC_Os03g12020	K02876	large subunit ribosomal protein L15
LOC_Os03g60100	K02879	large subunit ribosomal protein L17
LOC_Os02g15900	K02888	large subunit ribosomal protein L21
LOC_Os12g42884	K00549	5-methyltetrahydropteroyltriglutamate--homocysteine
LOC_Os07g10460	K03787	5'-nucleotidase [EC:3.1.3.5]
LOC_Os01g51280	K03787	5'-nucleotidase [EC:3.1.3.5]
LOC_Os04g42000	K00794	riboflavin synthase beta chain [EC:2.5.1.-]
LOC_Os08g02340	K02942	large subunit ribosomal protein LP1
LOC_Os03g22180	K02883	large subunit ribosomal protein L18e
LOC_Os05g06310	K02883	large subunit ribosomal protein L18e
LOC_Os01g54870	K02882	large subunit ribosomal protein L18Ae
LOC_Os03g21940	K02885	large subunit ribosomal protein L19e
LOC_Os03g38260	K02885	large subunit ribosomal protein L19e
LOC_Os03g22340	K02891	large subunit ribosomal protein L22e
LOC_Os07g47710	K02891	large subunit ribosomal protein L22e
LOC_Os02g18380	K02901	large subunit ribosomal protein L27e
LOC_Os10g41470	K02901	large subunit ribosomal protein L27e
LOC_Os05g46430	K02903	large subunit ribosomal protein L28e
LOC_Os01g51020	K02903	large subunit ribosomal protein L28e
LOC_Os02g54470	K02917	large subunit ribosomal protein L35Ae
LOC_Os05g38520	K02920	large subunit ribosomal protein L36e
LOC_Os01g62350	K02920	large subunit ribosomal protein L36e
LOC_Os02g37862	K02934	large subunit ribosomal protein L6e
LOC_Os04g39700	K02934	large subunit ribosomal protein L6e
LOC_Os04g51630	K02937	large subunit ribosomal protein L7e
LOC_Os08g13690	K02937	large subunit ribosomal protein L7e
LOC_Os08g42920	K02937	large subunit ribosomal protein L7e
LOC_Os12g38000	K02938	large subunit ribosomal protein L8e
LOC_Os07g42170	K02900	large subunit ribosomal protein L27Ae
LOC_Os03g18310	K01103	fructose-2,6-bisphosphatase [EC:3.1.3.46]
LOC_Os01g09570	K00850	6-phosphofructokinase [EC:2.7.1.11]
LOC_Os06g02144	K00033	6-phosphogluconate dehydrogenase [EC:1.1.1.44]
LOC_Os11g29400	K00033	6-phosphogluconate dehydrogenase [EC:1.1.1.44]
LOC_Os09g35970	K01057	6-phosphogluconolactonase [EC:3.1.1.31]
LOC_Os03g21490	K09013	Fe-S cluster assembly ATP-binding protein
LOC_Os01g02020	K00626	acetyl-CoA C-acetyltransferase [EC:2.3.1.9]
LOC_Os04g54330	K00670	peptide alpha-N-acetyltransferase [EC:2.3.1.88]
LOC_Os03g04410	K01681	aconitate hydratase 1 [EC:4.2.1.3]
LOC_Os02g39570	K01653	acetolactate synthase I/III small subunit [EC:2.2.1.6]
LOC_Os10g36650	K10355	actin, other eukaryote
LOC_Os03g61970	K10355	actin, other eukaryote
LOC_Os05g36290	K10355	actin, other eukaryote
LOC_Os09g32760	K10782	fatty acyl-ACP thioesterase A [EC:3.1.2.14 3.1.2.-]
LOC_Os07g47820	K00249	acyl-CoA dehydrogenase [EC:1.3.99.3]
LOC_Os05g03480	K00253	isovaleryl-CoA dehydrogenase [EC:1.3.99.10]
LOC_Os06g01390	K00232	acyl-CoA oxidase [EC:1.3.3.6]
LOC_Os04g31070	K03921	acyl-[acyl-carrier-protein] desaturase [EC:1.14.19.2]
LOC_Os03g23950	K12392	AP-1 complex subunit beta-1
LOC_Os01g68750	K12400	AP-4 complex subunit epsilon-1
LOC_Os07g43170	K13800	UMP-CMP kinase [EC:2.7.4.- 2.7.4.14]
LOC_Os02g53790	K13800	UMP-CMP kinase [EC:2.7.4.- 2.7.4.14]
LOC_Os03g19930	K01756	adenylosuccinate lyase [EC:4.3.2.2]
LOC_Os03g07840	K01939	adenylosuccinate synthase [EC:6.3.4.4]
LOC_Os03g49220	K01939	adenylosuccinate synthase [EC:6.3.4.4]
LOC_Os02g49980	K07977	Arf/Sar family, other
LOC_Os10g10244	K01872	alanyl-tRNA synthetase [EC:6.1.1.7]
LOC_Os07g09060	K00140	methylmalonate-semialdehyde dehydrogenase [EC:1.2.1.27]
LOC_Os06g15990	K00128	aldehyde dehydrogenase (NAD+) [EC:1.2.1.3]
LOC_Os08g32870	K00130	betaine-aldehyde dehydrogenase [EC:1.2.1.8]
LOC_Os02g49720	K00128	aldehyde dehydrogenase (NAD+) [EC:1.2.1.3]
LOC_Os01g40860	K12355	coniferyl-aldehyde dehydrogenase [EC:1.2.1.68]
LOC_Os08g34210	K00131	glyceraldehyde-3-phosphate dehydrogenase (NADP) [EC:1.2.1.9]
LOC_Os09g26880	K14085	aldehyde dehydrogenase family 7 member A1 [EC:1.2.1.31 1.2.1.8
LOC_Os11g08300	K00128	aldehyde dehydrogenase (NAD+) [EC:1.2.1.3]
LOC_Os04g39020	K00130	betaine-aldehyde dehydrogenase [EC:1.2.1.8]
LOC_Os10g06720	K01785	aldose 1-epimerase [EC:5.1.3.3]
LOC_Os04g56290	K01792	glucose-6-phosphate 1-epimerase [EC:5.1.3.15]
LOC_Os03g40270	K13379	reversibly glycosylated polypeptide/UDP-arabinopyranose mutase
LOC_Os07g41360	K13379	reversibly glycosylated polypeptide/UDP-arabinopyranose mutase
LOC_Os04g56520	K13379	reversibly glycosylated polypeptide/UDP-arabinopyranose mutase
LOC_Os07g48160	K07407	alpha-galactosidase [EC:3.2.1.22]
LOC_Os01g63270	K00688	starch phosphorylase [EC:2.4.1.1]
LOC_Os03g55090	K00688	starch phosphorylase [EC:2.4.1.1]
LOC_Os06g13650	K01231	alpha-mannosidase II [EC:3.2.1.114]
LOC_Os04g55050	K02433	aspartyl-tRNA(Asn)/glutamyl-tRNA (Gln) amidotransferase subunit A
LOC_Os05g38150	K12657	delta-1-pyrroline-5-carboxylate synthetase [EC:2.7.2.11 1.2.1.41]
LOC_Os04g46460	K00930	acetylglutamate/acetylaminoadipate kinase [EC:2.7.2.8 2.7.2.-]
LOC_Os01g62900	K12657	delta-1-pyrroline-5-carboxylate synthetase [EC:2.7.2.11 1.2.1.41]
LOC_Os04g53230	K00605	aminomethyltransferase [EC:2.1.2.10]
LOC_Os06g04380	K06980
LOC_Os03g60460	K01254	leukotriene-A4 hydrolase [EC:3.3.2.6]
LOC_Os08g44860	K01256	aminopeptidase N [EC:3.4.11.2]
LOC_Os02g55420	K00813	aspartate aminotransferase [EC:2.6.1.1]
LOC_Os02g14110	K00813	aspartate aminotransferase [EC:2.6.1.1]
LOC_Os10g25130	K00814	alanine transaminase [EC:2.6.1.2]
LOC_Os03g18810	K10206	LL-diaminopimelate aminotransferase [EC:2.6.1.83]
LOC_Os06g35540	K00813	aspartate aminotransferase [EC:2.6.1.1]
LOC_Os07g01760	K00814	alanine transaminase [EC:2.6.1.2]
LOC_Os02g47940	K00817	histidinol-phosphate aminotransferase [EC:2.6.1.9]
LOC_Os08g41990	K01845	glutamate-1-semialdehyde 2,1-aminomutase [EC:5.4.3.8]
LOC_Os03g07570	K00827	alanine-glyoxylate transaminase /
LOC_Os05g39770	K00827	alanine-glyoxylate transaminase /
LOC_Os03g21960	K00827	alanine-glyoxylate transaminase /
LOC_Os03g44150	K00819	ornithine--oxo-acid transaminase [EC:2.6.1.13]
LOC_Os08g14770	K00833	adenosylmethionine-8-amino-7-oxononanoate aminotransferase
LOC_Os07g46630	K01488	adenosine deaminase [EC:3.5.4.4]
LOC_Os02g08100	K01904	4-coumarate--CoA ligase [EC:6.2.1.12]
LOC_Os06g44620	K01904	4-coumarate--CoA ligase [EC:6.2.1.12]
LOC_Os03g04000	K10526	OPC-8:0 CoA ligase 1 [EC:6.2.1.-]
LOC_Os02g32490	K01895	acetyl-CoA synthetase [EC:6.2.1.1]
LOC_Os04g33190	K01895	acetyl-CoA synthetase [EC:6.2.1.1]
LOC_Os03g03450	K00766	anthranilate phosphoribosyltransferase [EC:2.4.2.18]
LOC_Os03g15780	K01657	anthranilate synthase component I [EC:4.1.3.27]
LOC_Os04g16450	K09872	aquaporin PIP
LOC_Os02g44630	K09872	aquaporin PIP
LOC_Os07g26690	K09872	aquaporin PIP
LOC_Os03g17120	K00620	glutamate N-acetyltransferase / amino-acid N-acetyltransferase
LOC_Os12g13320	K01940	argininosuccinate synthase [EC:6.3.4.5]
LOC_Os03g60780	K09562	hsp70-interacting protein
LOC_Os09g34970	K01551	arsenite-transporting ATPase [EC:3.6.3.16]
LOC_Os03g18130	K01953	asparagine synthase (glutamine-hydrolysing) [EC:6.3.5.4]
LOC_Os06g15420	K01953	asparagine synthase (glutamine-hydrolysing) [EC:6.3.5.4]
LOC_Os08g15030	K00609	aspartate carbamoyltransferase catalytic subunit [EC:2.1.3.2]
LOC_Os05g49200	K08245	phytepsin [EC:3.4.23.40]
LOC_Os12g13390	K01267	aspartyl aminopeptidase [EC:3.4.11.21]
LOC_Os11g34210	K02434	aspartyl-tRNA(Asn)/glutamyl-tRNA (Gln) amidotransferase subunit B
LOC_Os05g06280	K10393	kinesin family member 2/24
LOC_Os03g04169	K00765	ATP phosphoribosyltransferase [EC:2.4.2.17]
LOC_Os03g17070	K02109	F-type H+-transporting ATPase subunit b [EC:3.6.3.14]
LOC_Os07g31300	K02134	F-type H+-transporting ATPase subunit delta [EC:3.6.3.14]
LOC_Os06g43850	K02137	F-type H+-transporting ATPase oligomycin sensitivity conferral
LOC_Os02g51470	K02113	F-type H+-transporting ATPase subunit delta [EC:3.6.3.14]
LOC_Os10g17280	K02136	F-type H+-transporting ATPase subunit gamma [EC:3.6.3.14]
LOC_Os07g32880	K02115	F-type H+-transporting ATPase subunit gamma [EC:3.6.3.14]
LOC_Os06g45120	K02145	V-type H+-transporting ATPase subunit A [EC:3.6.3.14]
LOC_Os01g49190	K02133	F-type H+-transporting ATPase subunit beta [EC:3.6.3.14]
LOC_Os05g47980	K02133	F-type H+-transporting ATPase subunit beta [EC:3.6.3.14]
LOC_Os02g07870	K02145	V-type H+-transporting ATPase subunit A [EC:3.6.3.14]
LOC_Os06g37180	K02147	V-type H+-transporting ATPase subunit B [EC:3.6.3.14]
LOC_Os01g51380	K02147	V-type H+-transporting ATPase subunit B [EC:3.6.3.14]
LOC_Os11g34350	K06174	ATP-binding cassette, sub-family E, member 1
LOC_Os01g19450	K01648	ATP citrate (pro-S)-lyase [EC:2.3.3.8]
LOC_Os12g37870	K01648	ATP citrate (pro-S)-lyase [EC:2.3.3.8]
LOC_Os07g32800	K08341	GABA(A) receptor-associated protein (autophagy-related protein 8)
LOC_Os05g02510	K12373	beta-hexosaminidase [EC:3.2.1.52]
LOC_Os03g53230	K13811	3'-phosphoadenosine 5'-phosphosulfate synthase [EC:2.7.7.4 2.7.1.25]
LOC_Os12g25710	K01881	prolyl-tRNA synthetase [EC:6.1.1.15]
LOC_Os06g06980	K00588	caffeoyl-CoA O-methyltransferase [EC:2.1.1.104]
LOC_Os04g32950	K08054	calnexin
LOC_Os07g33110	K13412	calcium-dependent protein kinase [EC:2.7.11.1]
LOC_Os11g07040	K13412	calcium-dependent protein kinase [EC:2.7.11.1]
LOC_Os01g43410	K13412	calcium-dependent protein kinase [EC:2.7.11.1]
LOC_Os01g38970	K01955	carbamoyl-phosphate synthase large subunit [EC:6.3.5.5]
LOC_Os01g45274	K01673	carbonic anhydrase [EC:4.2.1.1]
LOC_Os12g44310	K11159	carotenoid cleavage dioxygenase
LOC_Os03g50300	K09313	homeobox protein cut-like
LOC_Os03g03910	K03781	catalase [EC:1.11.1.6]
LOC_Os06g51150	K03781	catalase [EC:1.11.1.6]
LOC_Os04g37580	K07232	cation transport protein ChaC
LOC_Os03g56800	K00088	IMP dehydrogenase [EC:1.1.1.205]
LOC_Os03g44900	K12580	CCR4-NOT transcription complex subunit 3
LOC_Os03g05730	K13525	transitional endoplasmic reticulum ATPase
LOC_Os05g08370	K10999	cellulose synthase A [EC:2.4.1.12]
LOC_Os03g17700	K04371	extracellular signal-regulated kinase 1/2 [EC:2.7.11.24]
LOC_Os06g06090	K04371	extracellular signal-regulated kinase 1/2 [EC:2.7.11.24]
LOC_Os11g32650	K00660	chalcone synthase [EC:2.3.1.74]
LOC_Os03g31300	K03695	ATP-dependent Clp protease ATP-binding subunit ClpB
LOC_Os02g08490	K03695	ATP-dependent Clp protease ATP-binding subunit ClpB
LOC_Os02g56040	K03686	molecular chaperone DnaJ
LOC_Os07g44740	K04078	chaperonin GroES
LOC_Os04g41620	K01183	chitinase [EC:3.2.1.14]
LOC_Os07g37240	K08915	light-harvesting complex II chlorophyll a/b binding protein 4
LOC_Os07g37550	K08914	light-harvesting complex II chlorophyll a/b binding protein 3
LOC_Os04g38410	K08917	light-harvesting complex II chlorophyll a/b binding protein 6
LOC_Os11g13890	K08916	light-harvesting complex II chlorophyll a/b binding protein 5
LOC_Os01g55870	K01850	chorismate mutase [EC:5.4.99.5]
LOC_Os02g08410	K01850	chorismate mutase [EC:5.4.99.5]
LOC_Os03g14990	K01736	chorismate synthase [EC:4.2.3.5]
LOC_Os08g34280	K09753	cinnamoyl-CoA reductase [EC:1.2.1.44]
LOC_Os02g13840	K01647	citrate synthase [EC:2.3.3.1]
LOC_Os08g23730	K01951	GMP synthase (glutamine-hydrolysing) [EC:6.3.5.2]
LOC_Os03g50880	K01658	anthranilate synthase component II [EC:4.1.3.27]
LOC_Os04g38950	K01658	anthranilate synthase component II [EC:4.1.3.27]
LOC_Os05g49050	K03189	urease accessory protein
LOC_Os08g25090	K03687	molecular chaperone GrpE
LOC_Os02g39870	K03687	molecular chaperone GrpE
LOC_Os06g51420	K12871	coiled-coil domain-containing protein 12
LOC_Os04g56070	K09613	COP9 signalosome complex subunit 5 [EC:3.4.-.-]
LOC_Os08g39070	K12179	COP9 signalosome complex subunit 6
LOC_Os08g44770	K04565	Cu/Zn superoxide dismutase [EC:1.15.1.1]
LOC_Os03g22810	K04565	Cu/Zn superoxide dismutase [EC:1.15.1.1]
LOC_Os07g46990	K04565	Cu/Zn superoxide dismutase [EC:1.15.1.1]
LOC_Os03g11960	K04565	Cu/Zn superoxide dismutase [EC:1.15.1.1]
LOC_Os04g52130	K00228	coproporphyrinogen III oxidase [EC:1.3.3.3]
LOC_Os08g35480	K09705	hypothetical protein
LOC_Os06g01700	K12863	protein CWC15
LOC_Os10g33270	K01725	cyanate lyase [EC:4.2.1.104]
LOC_Os02g09420	K07130
LOC_Os07g10600	K00559	sterol 24-C-methyltransferase [EC:2.1.1.41]
LOC_Os02g47310	K05928	tocopherol O-methyltransferase [EC:2.1.1.95]
LOC_Os10g37340	K01761	methionine-gamma-lyase [EC:4.4.1.11]
LOC_Os09g16910	K04487	cysteine desulfurase [EC:2.8.1.7]
LOC_Os02g27030	K01376
LOC_Os04g24600	K01376
LOC_Os04g08350	K13034	L-3-cyanoalanine synthase/ cysteine synthase [EC:2.5.1.47 4.4.1.9]
LOC_Os12g42980	K01738	cysteine synthase A [EC:2.5.1.47]
LOC_Os03g53650	K01738	cysteine synthase A [EC:2.5.1.47]
LOC_Os02g07720	K00968	choline-phosphate cytidylyltransferase [EC:2.7.7.15]
LOC_Os07g37030	K02636	cytochrome b6-f complex iron-sulfur subunit [EC:1.10.99.1]
LOC_Os03g59220	K00417	ubiquinol-cytochrome c reductase subunit 7 [EC:1.10.2.2]
LOC_Os04g32660	K00411	ubiquinol-cytochrome c reductase iron-sulfur subunit [EC:1.10.2.2]
LOC_Os02g32120	K00411	ubiquinol-cytochrome c reductase iron-sulfur subunit [EC:1.10.2.2]
LOC_Os06g05080	K02265	cytochrome c oxidase subunit Vb [EC:1.9.3.1]
LOC_Os01g42650	K02265	cytochrome c oxidase subunit Vb [EC:1.9.3.1]
LOC_Os05g34770	K08738	cytochrome c
LOC_Os05g23620	K00413	ubiquinol-cytochrome c reductase cytochrome c1 subunit [EC:1.10.2.2]
LOC_Os05g41440	K09754	p-coumarate 3-hydroxylase [EC:1.14.13.-]
LOC_Os05g25640	K00487	trans-cinnamate 4-monooxygenase [EC:1.14.13.11]
LOC_Os04g55720	K00058	D-3-phosphoglycerate dehydrogenase [EC:1.1.1.95]
LOC_Os06g44460	K00058	D-3-phosphoglycerate dehydrogenase [EC:1.1.1.95]
LOC_Os07g10250	K11594	ATP-dependent RNA helicase [EC:3.6.4.13]
LOC_Os02g05330	K03257	translation initiation factor eIF-4A
LOC_Os03g59050	K11594	ATP-dependent RNA helicase [EC:3.6.4.13]
LOC_Os03g06220	K01529
LOC_Os11g38670	K11594	ATP-dependent RNA helicase [EC:3.6.4.13]
LOC_Os03g19530	K12835	ATP-dependent RNA helicase DDX42 [EC:3.6.4.13]
LOC_Os12g29660	K13181	ATP-dependent RNA helicase DDX27 [EC:3.6.4.13]
LOC_Os08g36320	K01580	glutamate decarboxylase [EC:4.1.1.15]
LOC_Os02g50620	K00161	pyruvate dehydrogenase E1 component subunit alpha [EC:1.2.4.1]
LOC_Os06g13720	K00161	pyruvate dehydrogenase E1 component subunit alpha [EC:1.2.4.1]
LOC_Os04g02900	K00161	pyruvate dehydrogenase E1 component subunit alpha [EC:1.2.4.1]
LOC_Os01g46610	K00031	isocitrate dehydrogenase [EC:1.1.1.42]
LOC_Os04g42920	K00031	isocitrate dehydrogenase [EC:1.1.1.42]
LOC_Os01g14580	K00031	isocitrate dehydrogenase [EC:1.1.1.42]
LOC_Os05g49760	K00031	isocitrate dehydrogenase [EC:1.1.1.42]
LOC_Os02g09490	K00083	cinnamyl-alcohol dehydrogenase [EC:1.1.1.195]
LOC_Os03g45320	K00052	3-isopropylmalate dehydrogenase [EC:1.1.1.85]
LOC_Os03g01190	K00344	NADPH2:quinone reductase [EC:1.6.5.5]
LOC_Os09g23540	K00083	cinnamyl-alcohol dehydrogenase [EC:1.1.1.195]
LOC_Os11g10480	K00001	alcohol dehydrogenase [EC:1.1.1.1]
LOC_Os01g16900	K00030	isocitrate dehydrogenase (NAD+) [EC:1.1.1.41]
LOC_Os02g57040	K00121	S-(hydroxymethyl)glutathione dehydrogenase / alcohol dehydrogenase
LOC_Os08g43190	K00008	L-iditol 2-dehydrogenase [EC:1.1.1.14]
LOC_Os02g38200	K00030	isocitrate dehydrogenase (NAD+) [EC:1.1.1.41]
LOC_Os04g40310	K00030	isocitrate dehydrogenase (NAD+) [EC:1.1.1.41]
LOC_Os02g56180	K00344	NADPH2:quinone reductase [EC:1.6.5.5]
LOC_Os01g53910	K00020	3-hydroxyisobutyrate dehydrogenase [EC:1.1.1.31]
LOC_Os09g04730	K11147	dehydrogenase/reductase SDR family member 4 [EC:1.1.-.-]
LOC_Os06g49110	K01698	porphobilinogen synthase [EC:4.2.1.24]
LOC_Os01g25880	K00859	dephospho-CoA kinase [EC:2.7.1.24]
LOC_Os01g22520	K00382	dihydrolipoamide dehydrogenase [EC:1.8.1.4]
LOC_Os05g06460	K00382	dihydrolipoamide dehydrogenase [EC:1.8.1.4]
LOC_Os09g38759	K01633	dihydroneopterin aldolase [EC:4.1.2.25]
LOC_Os02g50350	K00207	dihydropyrimidine dehydrogenase (NADP+) [EC:1.3.1.2]
LOC_Os01g54370	K01465	dihydroorotase [EC:3.5.2.3]
LOC_Os08g44530	K01687	dihydroxy-acid dehydratase [EC:4.2.1.9]
LOC_Os06g34040	K03152	4-methyl-5(b-hydroxyethyl)-thiazole monophosphate biosynthesis
LOC_Os05g15520	K07466	replication factor A1
LOC_Os09g02284	K03011	DNA-directed RNA polymerase II subunit C
LOC_Os01g59140	K03013	DNA-directed RNA polymerase II subunit E
LOC_Os06g48230	K03016	DNA-directed RNA polymerase II subunit H
LOC_Os03g16860	K03283	heat shock 70kDa protein 1/8
LOC_Os01g62290	K03283	heat shock 70kDa protein 1/8
LOC_Os03g60620	K03283	heat shock 70kDa protein 1/8
LOC_Os03g16920	K03283	heat shock 70kDa protein 1/8
LOC_Os02g02410	K09490	heat shock 70kDa protein 5
LOC_Os01g08560	K09489	heat shock 70kDa protein 4
LOC_Os03g02260	K04043	molecular chaperone DnaK
LOC_Os02g48110	K09486	hypoxia up-regulated 1
LOC_Os07g10830	K12670	oligosaccharyltransferase complex subunit beta
LOC_Os03g60939	K00721	dolichol-phosphate mannosyltransferase [EC:2.4.1.83]
LOC_Os06g20340	K04459	dual specificity phosphatase [EC:3.1.3.16 3.1.3.48]
LOC_Os01g69130	K01528	dynamin GTPase [EC:3.6.5.5]
LOC_Os01g15260	K10418	dynein light chain LC8-type
LOC_Os03g61920	K03522	electron transfer flavoprotein alpha subunit
LOC_Os04g10400	K03521	electron transfer flavoprotein beta subunit
LOC_Os02g12800	K03233	elongation factor EF-1 gamma subunit
LOC_Os06g37440	K03233	elongation factor EF-1 gamma subunit
LOC_Os02g12794	K03233	elongation factor EF-1 gamma subunit
LOC_Os07g46750	K03232	elongation factor EF-1 beta subunit
LOC_Os07g42300	K03232	elongation factor EF-1 beta subunit
LOC_Os03g29260	K03232	elongation factor EF-1 beta subunit
LOC_Os03g63410	K02358	elongation factor EF-Tu [EC:3.6.5.3]
LOC_Os04g45490	K02355	elongation factor EF-G [EC:3.6.5.3]
LOC_Os01g53900	K03234	elongation factor EF-2 [EC:3.6.5.3]
LOC_Os01g52470	K03234	elongation factor EF-2 [EC:3.6.5.3]
LOC_Os06g40600	K12852	116 kDa U5 small nuclear ribonucleoprotein component
LOC_Os03g36780	K02355	elongation factor EF-G [EC:3.6.5.3]
LOC_Os03g52630	K01179	endoglucanase [EC:3.2.1.4]
LOC_Os08g27850	K03627	putative transcription factor
LOC_Os10g08550	K01689	enolase [EC:4.2.1.11]
LOC_Os03g14450	K01689	enolase [EC:4.2.1.11]
LOC_Os06g04510	K01689	enolase [EC:4.2.1.11]
LOC_Os09g20820	K01689	enolase [EC:4.2.1.11]
LOC_Os08g23810	K00208	enoyl-[acyl-carrier protein] reductase I [EC:1.3.1.9]
LOC_Os06g39344	K01692	enoyl-CoA hydratase [EC:4.2.1.17]
LOC_Os01g54860	K05605	3-hydroxyisobutyryl-CoA hydrolase [EC:3.1.2.4]
LOC_Os03g19680	K01692	enoyl-CoA hydratase [EC:4.2.1.17]
LOC_Os01g47350	K01661	naphthoate synthase [EC:4.1.3.36]
LOC_Os02g43720	K01692	enoyl-CoA hydratase [EC:4.2.1.17]
LOC_Os01g70090	K12663	delta(3,5)-Delta(2,4)-dienoyl-CoA isomerase [EC:5.3.3.-]
LOC_Os06g29180	K00122	formate dehydrogenase [EC:1.2.1.2]
LOC_Os11g26850	K01251	adenosylhomocysteinase [EC:3.3.1.1]
LOC_Os07g39870	K03265	peptide chain release factor eRF subunit 1
LOC_Os06g23440	K03236	translation initiation factor eIF-1A
LOC_Os02g19770	K03236	translation initiation factor eIF-1A
LOC_Os03g21550	K03238	translation initiation factor eIF-2 beta subunit
LOC_Os07g48300	K03238	translation initiation factor eIF-2 beta subunit
LOC_Os10g41960	K03253	translation initiation factor eIF-3 subunit 9
LOC_Os05g49150	K03251	translation initiation factor eIF-3 subunit 7
LOC_Os07g12110	K03250	translation initiation factor eIF-3 subunit 6
LOC_Os05g01450	K03249	translation initiation factor eIF-3 subunit 5
LOC_Os04g30780	K03247	translation initiation factor eIF-3 subunit 3
LOC_Os07g36940	K03260	translation initiation factor eIF-4F
LOC_Os12g32240	K03263	translation initiation factor eIF-5A
LOC_Os03g55150	K03263	translation initiation factor eIF-5A
LOC_Os07g44620	K03264	translation initiation factor eIF-6
LOC_Os03g15590	K03259	translation initiation factor eIF-4E
LOC_Os08g37320	K02138	F-type H+-transporting ATPase subunit d [EC:3.6.3.14]
LOC_Os09g07500	K12843	U4/U6 small nuclear ribonucleoprotein PRP3
LOC_Os03g60509	K01859	chalcone isomerase [EC:5.5.1.6]
LOC_Os03g18510	K03237	translation initiation factor eIF-2 alpha subunit
LOC_Os06g20390	K12199	vacuolar protein sorting-associated protein VTA1
LOC_Os05g48630	K02695	photosystem I subunit VI
LOC_Os03g63670	K13211	GC-rich sequence DNA-binding factor
LOC_Os05g36000	K02372	3R-hydroxymyristoyl ACP dehydrase [EC:4.2.1.-]
LOC_Os02g51080	K10960	geranylgeranyl reductase [EC:1.3.1.83]
LOC_Os07g34570	K03146	thiamine biosynthetic enzyme
LOC_Os12g04520	K00225	L-galactono-1,4-lactone dehydorogenase [EC:1.3.2.3]
LOC_Os03g57120	K02641	ferredoxin--NADP+ reductase [EC:1.18.1.2]
LOC_Os07g05400	K02641	ferredoxin--NADP+ reductase [EC:1.18.1.2]
LOC_Os06g01850	K02641	ferredoxin--NADP+ reductase [EC:1.18.1.2]
LOC_Os02g01340	K02641	ferredoxin--NADP+ reductase [EC:1.18.1.2]
LOC_Os05g42350	K00392	sulfite reductase (ferredoxin) [EC:1.8.7.1]
LOC_Os07g44660	K00854	xylulokinase [EC:2.7.1.17]
LOC_Os08g44250	K03938	NADH dehydrogenase (ubiquinone) Fe-S protein 5 [EC:1.6.5.3 1.6.99.3]
LOC_Os04g16680	K01100	sedoheptulose-bisphosphatase [EC:3.1.3.37]
LOC_Os03g16050	K03841	fructose-1,6-bisphosphatase I [EC:3.1.3.11]
LOC_Os05g33380	K01623	fructose-bisphosphate aldolase, class I [EC:4.1.2.13]
LOC_Os11g07020	K01623	fructose-bisphosphate aldolase, class I [EC:4.1.2.13]
LOC_Os01g02880	K01623	fructose-bisphosphate aldolase, class I [EC:4.1.2.13]
LOC_Os06g40640	K01623	fructose-bisphosphate aldolase, class I [EC:4.1.2.13]
LOC_Os03g21950	K01679	fumarate hydratase, class II [EC:4.2.1.2]
LOC_Os02g10310	K01555	fumarylacetoacetase [EC:3.7.1.2]
LOC_Os05g44130	K01307	gamma-glutamyl hydrolase [EC:3.4.19.9]
LOC_Os08g09350	K11294	nucleolin
LOC_Os02g58510	K00872	homoserine kinase [EC:2.7.1.39]
LOC_Os01g58790	K00919	4-diphosphocytidyl-2-C-methyl-D-erythritol kinase [EC:2.7.1.148]
LOC_Os09g12660	K00975	glucose-1-phosphate adenylyltransferase [EC:2.7.7.27]
LOC_Os05g50380	K00975	glucose-1-phosphate adenylyltransferase [EC:2.7.7.27]
LOC_Os03g20300	K00036	glucose-6-phosphate 1-dehydrogenase [EC:1.1.1.49]
LOC_Os02g38840	K00036	glucose-6-phosphate 1-dehydrogenase [EC:1.1.1.49]
LOC_Os04g40874	K00036	glucose-6-phosphate 1-dehydrogenase [EC:1.1.1.49]
LOC_Os06g14510	K01810	glucose-6-phosphate isomerase [EC:5.3.1.9]
LOC_Os03g56460	K01810	glucose-6-phosphate isomerase [EC:5.3.1.9]
LOC_Os09g29070	K01810	glucose-6-phosphate isomerase [EC:5.3.1.9]
LOC_Os03g51080	K01580	glutamate decarboxylase [EC:4.1.1.15]
LOC_Os03g13300	K01580	glutamate decarboxylase [EC:4.1.1.15]
LOC_Os03g58040	K00261	glutamate dehydrogenase (NAD(P)+) [EC:1.4.1.3]
LOC_Os04g45970	K00261	glutamate dehydrogenase (NAD(P)+) [EC:1.4.1.3]
LOC_Os04g56400	K01915	glutamine synthetase [EC:6.3.1.2]
LOC_Os03g12290	K01915	glutamine synthetase [EC:6.3.1.2]
LOC_Os01g09000	K01886	glutaminyl-tRNA synthetase [EC:6.1.1.18]
LOC_Os05g08990	K01886	glutaminyl-tRNA synthetase [EC:6.1.1.18]
LOC_Os03g24380	K00432	glutathione peroxidase [EC:1.11.1.9]
LOC_Os04g46960	K00432	glutathione peroxidase [EC:1.11.1.9]
LOC_Os02g44500	K00432	glutathione peroxidase [EC:1.11.1.9]
LOC_Os02g56850	K00383	glutathione reductase (NADPH) [EC:1.8.1.7]
LOC_Os03g06740	K00383	glutathione reductase (NADPH) [EC:1.8.1.7]
LOC_Os10g38740	K00799	glutathione S-transferase [EC:2.5.1.18]
LOC_Os11g42350	K01920	glutathione synthase [EC:6.3.2.3]
LOC_Os04g40950	K00134	glyceraldehyde 3-phosphate dehydrogenase [EC:1.2.1.12]
LOC_Os02g38920	K00134	glyceraldehyde 3-phosphate dehydrogenase [EC:1.2.1.12]
LOC_Os08g03290	K00134	glyceraldehyde 3-phosphate dehydrogenase [EC:1.2.1.12]
LOC_Os04g38600	K05298	glyceraldehyde-3-phosphate dehydrogenase (NADP+) (phosphorylating)
LOC_Os03g03720	K05298	glyceraldehyde-3-phosphate dehydrogenase (NADP+) (phosphorylating)
LOC_Os02g07490	K00134	glyceraldehyde 3-phosphate dehydrogenase [EC:1.2.1.12]
LOC_Os06g45590	K00134	glyceraldehyde 3-phosphate dehydrogenase [EC:1.2.1.12]
LOC_Os01g55780	K01126	glycerophosphoryl diester phosphodiesterase [EC:3.1.4.46]
LOC_Os03g40670	K01126	glycerophosphoryl diester phosphodiesterase [EC:3.1.4.46]
LOC_Os02g07410	K02437	glycine cleavage system H protein
LOC_Os10g37180	K02437	glycine cleavage system H protein
LOC_Os06g45670	K02437	glycine cleavage system H protein
LOC_Os01g51410	K00281	glycine dehydrogenase [EC:1.4.4.2]
LOC_Os09g29404	K02438	glycogen operon protein GlgX [EC:3.2.1.-]
LOC_Os03g11720	K05546	alpha 1,3-glucosidase [EC:3.2.1.84]
LOC_Os08g13920	K08235	xyloglucan:xyloglucosyl transferase [EC:2.4.1.207]
LOC_Os06g48200	K08235	xyloglucan:xyloglucosyl transferase [EC:2.4.1.207]
LOC_Os06g48160	K08235	xyloglucan:xyloglucosyl transferase [EC:2.4.1.207]
LOC_Os11g33270	K08235	xyloglucan:xyloglucosyl transferase [EC:2.4.1.207]
LOC_Os01g51170	K00671	glycylpeptide N-tetradecanoyltransferase [EC:2.3.1.97]
LOC_Os05g22970	K01759	lactoylglutathione lyase [EC:4.4.1.5]
LOC_Os03g63710	K12493	ADP-ribosylation factor GTPase-activating protein 2/3
LOC_Os03g17020	K12492	ADP-ribosylation factor GTPase-activating protein 1
LOC_Os01g54910	K06207	GTP-binding protein
LOC_Os08g09940	K06942
LOC_Os05g28940	K06944
LOC_Os11g37080	K11128	H/ACA ribonucleoprotein complex subunit 1
LOC_Os07g44190	K11131	H/ACA ribonucleoprotein complex subunit 4 [EC:5.4.99.-]
LOC_Os11g29370	K09880	enolase-phosphatase E1 [EC:3.1.3.77]
LOC_Os03g16670	K07025	putative hydrolase of the HAD superfamily
LOC_Os01g45390	K07023	putative hydrolases of HD superfamily
LOC_Os01g60440	K08876	SCY1-like
LOC_Os09g07510	K03456	protein phosphatase 2 (formerly 2A), regulatory subunit A
LOC_Os02g43020	K09553	stress-induced-phosphoprotein 1
LOC_Os09g30412	K04079	molecular chaperone HtpG
LOC_Os08g39140	K04079	molecular chaperone HtpG
LOC_Os06g40080	K00510	heme oxygenase [EC:1.14.99.3]
LOC_Os01g53930	K00844	hexokinase [EC:2.7.1.1]
LOC_Os07g09890	K00844	hexokinase [EC:2.7.1.1]
LOC_Os01g13190	K00013	histidinol dehydrogenase [EC:1.1.1.23]
LOC_Os07g47500	K05931	histone-arginine methyltransferase CARM1 [EC:2.1.1.125]
LOC_Os04g36620	K13617	protein phosphatase methylesterase 1 [EC:3.1.1.-]
LOC_Os07g36190	K01823	isopentenyl-diphosphate delta-isomerase [EC:5.3.3.2]
LOC_Os05g34180	K01823	isopentenyl-diphosphate delta-isomerase [EC:5.3.3.2]
LOC_Os02g46520	K01438	acetylornithine deacetylase [EC:3.5.1.16]
LOC_Os07g14590	K01463
LOC_Os03g57220	K11517	(S)-2-hydroxy-acid oxidase [EC:1.1.3.15]
LOC_Os02g39160	K03526	(E)-4-hydroxy-3-methylbut-2-enyl-diphosphate synthase [EC:1.17.7.1]
LOC_Os08g23150	K01609	indole-3-glycerol phosphate synthase [EC:4.1.1.48]
LOC_Os04g39270	K01609	indole-3-glycerol phosphate synthase [EC:4.1.1.48]
LOC_Os11g11050	K08963	methylthioribose-1-phosphate isomerase [EC:5.3.1.23]
LOC_Os10g31940	K01519	nucleoside-triphosphate pyrophosphatase [EC:3.6.1.19]
LOC_Os10g42550	K00913	inositol-1,3,4-trisphosphate 5/6-kinase / inositol-tetrakisphosphate
LOC_Os12g08280	K01082	3'(2'), 5'-bisphosphate nucleotidase [EC:3.1.3.7]
LOC_Os03g39000	K10047	inositol-phosphate phosphatase / L-galactose 1-phosphate phosphatase
LOC_Os09g19734	K05862	voltage-dependent anion channel
LOC_Os05g49800	K00053	ketol-acid reductoisomerase [EC:1.1.1.86]
LOC_Os02g41590	K00856	adenosine kinase [EC:2.7.1.20]
LOC_Os08g02120	K00847	fructokinase [EC:2.7.1.4]
LOC_Os01g66940	K00847	fructokinase [EC:2.7.1.4]
LOC_Os06g12600	K00847	fructokinase [EC:2.7.1.4]
LOC_Os04g43750	K00856	adenosine kinase [EC:2.7.1.20]
LOC_Os01g47550	K00852	ribokinase [EC:2.7.1.15]
LOC_Os03g03020	K02867	large subunit ribosomal protein L11
LOC_Os10g33800	K00025	malate dehydrogenase [EC:1.1.1.37]
LOC_Os01g46070	K00026	malate dehydrogenase [EC:1.1.1.37]
LOC_Os05g49880	K00026	malate dehydrogenase [EC:1.1.1.37]
LOC_Os01g61380	K00026	malate dehydrogenase [EC:1.1.1.37]
LOC_Os08g33720	K00026	malate dehydrogenase [EC:1.1.1.37]
LOC_Os12g43630	K00026	malate dehydrogenase [EC:1.1.1.37]
LOC_Os03g56280	K00026	malate dehydrogenase [EC:1.1.1.37]
LOC_Os09g32650	K01869	leucyl-tRNA synthetase [EC:6.1.1.4]
LOC_Os03g49380	K00454	lipoxygenase [EC:1.13.11.12]
LOC_Os01g64690	K12622	U6 snRNA-associated Sm-like protein LSm3
LOC_Os01g15310	K12623	U6 snRNA-associated Sm-like protein LSm4
LOC_Os02g09750	K06443	lycopene beta cyclase [EC:1.14.-.-]
LOC_Os06g50000	K03965	NADH dehydrogenase (ubiquinone) 1 beta subcomplex 9 [EC:1.6.5.3
LOC_Os07g44650	K03950	NADH dehydrogenase (ubiquinone) 1 alpha subcomplex 6 [EC:1.6.5.3
LOC_Os10g05069	K01191	alpha-mannosidase [EC:3.2.1.24]
LOC_Os03g59640	K03404	magnesium chelatase subunit D [EC:6.6.1.1]
LOC_Os03g36540	K03405	magnesium chelatase subunit I [EC:6.6.1.1]
LOC_Os06g04150	K03428	magnesium-protoporphyrin O-methyltransferase [EC:2.1.1.11]
LOC_Os12g18880	K12877	protein mago nashi
LOC_Os03g18590	K00645	[acyl-carrier-protein] S-malonyltransferase [EC:2.3.1.39]
LOC_Os01g16940	K11755	phosphoribosyl-ATP pyrophosphohydrolase / phosphoribosyl-AMP
LOC_Os05g39850	K02541	minichromosome maintenance protein 3
LOC_Os04g56646	K03038	26S proteasome regulatory subunit N8
LOC_Os01g67000	K03969	phage shock protein A
LOC_Os08g20270	K06990
LOC_Os03g21460	K01069	hydroxyacylglutathione hydrolase [EC:3.1.2.6]
LOC_Os06g31210	K01874	methionyl-tRNA synthetase [EC:6.1.1.10]
LOC_Os08g32850	K01969	3-methylcrotonyl-CoA carboxylase beta subunit [EC:6.4.1.4]
LOC_Os01g23620	K07953	GTP-binding protein SAR1 [EC:3.6.5.-]
LOC_Os05g23720	K05863	solute carrier family 25 (mitochondrial carrier; adenine nucleotide
LOC_Os02g48720	K05863	solute carrier family 25 (mitochondrial carrier; adenine nucleotide
LOC_Os10g42299	K03454	mitochondrial carrier protein, MC family
LOC_Os01g09560	K01412	mitochondrial processing peptidase [EC:3.4.24.64]
LOC_Os03g11410	K01412	mitochondrial processing peptidase [EC:3.4.24.64]
LOC_Os01g53700	K01412	mitochondrial processing peptidase [EC:3.4.24.64]
LOC_Os02g04740	K03635	molybdopterin synthase catalytic subunit [EC:2.-.-.-]
LOC_Os09g39380	K08232	monodehydroascorbate reductase (NADH) [EC:1.6.5.4]
LOC_Os08g44340	K08232	monodehydroascorbate reductase (NADH) [EC:1.6.5.4]
LOC_Os08g05570	K08232	monodehydroascorbate reductase (NADH) [EC:1.6.5.4]
LOC_Os09g25580	K03715	1,2-diacylglycerol 3-beta-galactosyltransferase [EC:2.4.1.46]
LOC_Os05g46490	K11864	BRCA1/BRCA2-containing complex subunit 3
LOC_Os06g02220	K01244	5'-methylthioadenosine nucleosidase [EC:3.2.2.16]
LOC_Os04g28090	K12860	pre-mRNA-splicing factor CDC5/CEF1
LOC_Os03g16980	K01710	dTDP-glucose 4,6-dehydratase [EC:4.2.1.46]
LOC_Os10g28200	K10046	GDP-D-mannose 3', 5'-epimerase [EC:5.1.3.18 5.1.3.-]
LOC_Os05g32140	K06118	UDP-sulfoquinovose synthase [EC:3.13.1.1]
LOC_Os10g35960	K00028	malate dehydrogenase (decarboxylating) [EC:1.1.1.39]
LOC_Os10g42840	K00329	NADH dehydrogenase [EC:1.6.5.3]
LOC_Os03g19890	K03949	NADH dehydrogenase (ubiquinone) 1 alpha subcomplex 5 [EC:1.6.5.3
LOC_Os02g57180	K03953	NADH dehydrogenase (ubiquinone) 1 alpha subcomplex 9 [EC:1.6.5.3
LOC_Os05g43360	K03943	NADH dehydrogenase (ubiquinone) flavoprotein 2 [EC:1.6.5.3 1.6.99.3]
LOC_Os07g39710	K03937	NADH dehydrogenase (ubiquinone) Fe-S protein 4 [EC:1.6.5.3 1.6.99.3]
LOC_Os01g07910	K00326	cytochrome-b5 reductase [EC:1.6.2.2]
LOC_Os01g59930	K00326	cytochrome-b5 reductase [EC:1.6.2.2]
LOC_Os07g45090	K03942	NADH dehydrogenase (ubiquinone) flavoprotein 1 [EC:1.6.5.3 1.6.99.3]
LOC_Os05g09440	K00029	malate dehydrogenase (oxaloacetate-decarboxylating)(NADP+)
LOC_Os01g54030	K00029	malate dehydrogenase (oxaloacetate-decarboxylating)(NADP+)
LOC_Os01g57570	K03809	Trp repressor binding protein
LOC_Os06g05660	K11279	nucleosome assembly protein 1-like 1
LOC_Os05g46230	K11279	nucleosome assembly protein 1-like 1
LOC_Os05g31000	K03626	nascent polypeptide-associated complex subunit alpha
LOC_Os03g02960	K03626	nascent polypeptide-associated complex subunit alpha
LOC_Os01g71230	K03626	nascent polypeptide-associated complex subunit alpha
LOC_Os09g38060	K00767	nicotinate-nucleotide pyrophosphorylase (carboxylating)
LOC_Os03g07910	K13566	omega-amidase [EC:3.5.1.3]
LOC_Os07g30170	K01431	beta-ureidopropionase [EC:3.5.1.6]
LOC_Os02g42350	K13035	beta-cyano-L-alanine hydratase/nitrilase [EC:3.5.5.1 3.5.5.4]
LOC_Os02g42330	K01501	nitrilase [EC:3.5.5.1]
LOC_Os03g25390	K08494	novel plant SNARE
LOC_Os01g27990	K14015	nuclear protein localization protein 4 homolog
LOC_Os10g41410	K00940	nucleoside-diphosphate kinase [EC:2.7.4.6]
LOC_Os07g30970	K00940	nucleoside-diphosphate kinase [EC:2.7.4.6]
LOC_Os05g51700	K00940	nucleoside-diphosphate kinase [EC:2.7.4.6]
LOC_Os12g36194	K00940	nucleoside-diphosphate kinase [EC:2.7.4.6]
LOC_Os08g06100	K05279	flavonol 3-O-methyltransferase [EC:2.1.1.76]
LOC_Os04g55650	K01376
LOC_Os09g27030	K01366	cathepsin H [EC:3.4.22.16]
LOC_Os03g17690	K00434	L-ascorbate peroxidase [EC:1.11.1.11]
LOC_Os07g49400	K00434	L-ascorbate peroxidase [EC:1.11.1.11]
LOC_Os04g14680	K00434	L-ascorbate peroxidase [EC:1.11.1.11]
LOC_Os08g43560	K00434	L-ascorbate peroxidase [EC:1.11.1.11]
LOC_Os12g07830	K00434	L-ascorbate peroxidase [EC:1.11.1.11]
LOC_Os12g07820	K00434	L-ascorbate peroxidase [EC:1.11.1.11]
LOC_Os04g35520	K00434	L-ascorbate peroxidase [EC:1.11.1.11]
LOC_Os02g34810	K00434	L-ascorbate peroxidase [EC:1.11.1.11]
LOC_Os01g32350	K01358	ATP-dependent Clp protease, protease subunit [EC:3.4.21.92]
LOC_Os02g42290	K01358	ATP-dependent Clp protease, protease subunit [EC:3.4.21.92]
LOC_Os03g19510	K01358	ATP-dependent Clp protease, protease subunit [EC:3.4.21.92]
LOC_Os01g59530	K02183	calmodulin
LOC_Os08g02420	K13448	calcium-binding protein CML
LOC_Os05g49380	K01362
LOC_Os06g51029	K03798	cell division protease FtsH [EC:3.4.24.-]
LOC_Os06g45820	K03798	cell division protease FtsH [EC:3.4.24.-]
LOC_Os05g38400	K08956	AFG3 family protein [EC:3.4.24.-]
LOC_Os09g36300	K01338	ATP-dependent Lon protease [EC:3.4.21.53]
LOC_Os11g09280	K09580	protein disulfide-isomerase A1 [EC:5.3.4.1]
LOC_Os02g01010	K09580	protein disulfide-isomerase A1 [EC:5.3.4.1]
LOC_Os05g06430	K09584	protein disulfide-isomerase A6 [EC:5.3.4.1]
LOC_Os01g23740	K09584	protein disulfide-isomerase A6 [EC:5.3.4.1]
LOC_Os09g27830	K09584	protein disulfide-isomerase A6 [EC:5.3.4.1]
LOC_Os06g51410	K01354	oligopeptidase B [EC:3.4.21.83]
LOC_Os10g28020	K01303	acylaminoacyl-peptidase [EC:3.4.19.1]
LOC_Os02g18850	K01278	dipeptidyl-peptidase 4 [EC:3.4.14.5]
LOC_Os04g25560	K01287	carboxypeptidase C [EC:3.4.16.5]
LOC_Os07g46350	K01288	carboxypeptidase D [EC:3.4.16.6]
LOC_Os08g44640	K09646	serine carboxypeptidase 1 [EC:3.4.16.-]
LOC_Os02g44520	K01280	tripeptidyl-peptidase II [EC:3.4.14.10]
LOC_Os08g34150	K03098	outer membrane lipoprotein Blc
LOC_Os02g10260	K07277	outer membrane protein
LOC_Os05g45950	K05862	voltage-dependent anion channel
LOC_Os01g40570	K05862	voltage-dependent anion channel
LOC_Os01g16910	K11518	mitochondrial import receptor subunit TOM40
LOC_Os03g20750	K11518	mitochondrial import receptor subunit TOM40
LOC_Os12g29760	K00064	D-threo-aldose 1-dehydrogenase [EC:1.1.1.122]
LOC_Os10g35370	K00218	protochlorophyllide reductase [EC:1.3.1.33]
LOC_Os03g59610	K09841	xanthoxin dehydrogenase [EC:1.1.1.288]
LOC_Os07g36080	K08901	photosystem II oxygen-evolving enhancer protein 3
LOC_Os07g01480	K08901	photosystem II oxygen-evolving enhancer protein 3
LOC_Os01g31690	K02716	photosystem II oxygen-evolving enhancer protein 1
LOC_Os02g56130	K04802	proliferating cell nuclear antigen
LOC_Os10g36470	K01265	methionyl aminopeptidase [EC:3.4.11.18]
LOC_Os06g10770	K01436	aminoacylase [EC:3.5.1.14]
LOC_Os02g04100	K02725	20S proteasome subunit alpha 6 [EC:3.4.25.1]
LOC_Os03g08280	K02730	20S proteasome subunit alpha 1 [EC:3.4.25.1]
LOC_Os09g33986	K02736	20S proteasome subunit beta 7 [EC:3.4.25.1]
LOC_Os01g59600	K02727	20S proteasome subunit alpha 7 [EC:3.4.25.1]
LOC_Os11g40140	K02729	20S proteasome subunit alpha 5 [EC:3.4.25.1]
LOC_Os06g06030	K02737	20S proteasome subunit beta 5 [EC:3.4.25.1]
LOC_Os06g07140	K02728	20S proteasome subunit alpha 3 [EC:3.4.25.1]
LOC_Os03g26970	K02726	20S proteasome subunit alpha 2 [EC:3.4.25.1]
LOC_Os03g48930	K02734	20S proteasome subunit beta 4 [EC:3.4.25.1]
LOC_Os09g32800	K02732	20S proteasome subunit beta 6 [EC:3.4.25.1]
LOC_Os05g41180	K02727	20S proteasome subunit alpha 7 [EC:3.4.25.1]
LOC_Os02g53060	K02738	20S proteasome subunit beta 1 [EC:3.4.25.1]
LOC_Os08g43540	K02731	20S proteasome subunit alpha 4 [EC:3.4.25.1]
LOC_Os06g04800	K02738	20S proteasome subunit beta 1 [EC:3.4.25.1]
LOC_Os05g09490	K02739	20S proteasome subunit beta 2 [EC:3.4.25.1]
LOC_Os08g41730	K02732	20S proteasome subunit beta 6 [EC:3.4.25.1]
LOC_Os09g36710	K02731	20S proteasome subunit alpha 4 [EC:3.4.25.1]
LOC_Os10g41400	K07304	peptide-methionine (S)-S-oxide reductase [EC:1.8.4.11]
LOC_Os01g68710	K09569	FK506-binding protein 2 [EC:5.2.1.8]
LOC_Os02g52290	K01802	peptidylprolyl isomerase [EC:5.2.1.8]
LOC_Os06g45340	K01802	peptidylprolyl isomerase [EC:5.2.1.8]
LOC_Os02g02890	K01802	peptidylprolyl isomerase [EC:5.2.1.8]
LOC_Os09g39780	K03767	peptidyl-prolyl cis-trans isomerase A (cyclophilin A) [EC:5.2.1.8]
LOC_Os03g59700	K09567	peptidyl-prolyl isomerase H (cyclophilin H) [EC:5.2.1.8]
LOC_Os01g18210	K03768	peptidyl-prolyl cis-trans isomerase B (cyclophilin B) [EC:5.2.1.8]
LOC_Os08g44520	K12733	peptidyl-prolyl cis-trans isomerase-like 1 [EC:5.2.1.8]
LOC_Os06g04000	K12734	peptidyl-prolyl cis-trans isomerase-like 3 [EC:5.2.1.8]
LOC_Os09g24540	K09579	peptidyl-prolyl cis-trans isomerase NIMA-interacting 4 [EC:5.2.1.8]
LOC_Os08g41390	K09571	FK506-binding protein 4/5 [EC:5.2.1.8]
LOC_Os02g28980	K01802	peptidylprolyl isomerase [EC:5.2.1.8]
LOC_Os08g02110	K00430	peroxidase [EC:1.11.1.7]
LOC_Os02g58720	K00430	peroxidase [EC:1.11.1.7]
LOC_Os09g29490	K00430	peroxidase [EC:1.11.1.7]
LOC_Os06g46799	K00430	peroxidase [EC:1.11.1.7]
LOC_Os01g36240	K00430	peroxidase [EC:1.11.1.7]
LOC_Os06g09610	K03564	peroxiredoxin Q/BCP [EC:1.11.1.15]
LOC_Os02g44220	K13337	peroxin-19
LOC_Os01g16146	K06998
LOC_Os02g41630	K13064	phenylalanine/tyrosine ammonia-lyase [EC:4.3.1.25]
LOC_Os10g26130	K01889	phenylalanyl-tRNA synthetase alpha chain [EC:6.1.1.20]
LOC_Os03g49440	K07025	putative hydrolase of the HAD superfamily
LOC_Os07g42960	K01626	3-deoxy-7-phosphoheptulonate synthase [EC:2.5.1.54]
LOC_Os08g37790	K01626	3-deoxy-7-phosphoheptulonate synthase [EC:2.5.1.54]
LOC_Os09g14670	K01595	phosphoenolpyruvate carboxylase [EC:4.1.1.31]
LOC_Os03g50480	K01835	phosphoglucomutase [EC:5.4.2.2]
LOC_Os10g11140	K01835	phosphoglucomutase [EC:5.4.2.2]
LOC_Os02g07260	K00927	phosphoglycerate kinase [EC:2.7.2.3]
LOC_Os06g45710	K00927	phosphoglycerate kinase [EC:2.7.2.3]
LOC_Os06g40190	K01115	phospholipase D [EC:3.1.4.4]
LOC_Os06g40170	K01115	phospholipase D [EC:3.1.4.4]
LOC_Os04g58580	K01840	phosphomannomutase [EC:5.4.2.8]
LOC_Os12g09000	K14153	hydroxymethylpyrimidine kinase / phosphomethylpyrimidine kinase /
LOC_Os05g38170	K00761	uracil phosphoribosyltransferase [EC:2.4.2.9]
LOC_Os02g03540	K00948	ribose-phosphate pyrophosphokinase [EC:2.7.6.1]
LOC_Os08g09210	K01945	phosphoribosylamine--glycine ligase [EC:6.3.4.13]
LOC_Os01g10280	K11808	phosphoribosylaminoimidazole carboxylase [EC:4.1.1.21]
LOC_Os09g29190	K01923	phosphoribosylaminoimidazole-succinocarboxamide synthase
LOC_Os03g61600	K01933	phosphoribosylformylglycinamidine cyclo-ligase [EC:6.3.3.1]
LOC_Os02g47020	K00855	phosphoribulokinase [EC:2.7.1.19]
LOC_Os11g41160	K01079	phosphoserine phosphatase [EC:3.1.3.3]
LOC_Os08g44680	K02692	photosystem I subunit II
LOC_Os03g56670	K02694	photosystem I subunit III
LOC_Os07g25430	K02693	photosystem I subunit IV
LOC_Os03g21560	K08902	photosystem II Psb27 protein
LOC_Os03g62790	K06911
LOC_Os04g56160	K01535	H+-transporting ATPase [EC:3.6.3.6]
LOC_Os01g52390	K13199	plasminogen activator inhibitor 1 RNA-binding protein
LOC_Os06g01210	K02638	plastocyanin
LOC_Os07g07310	K00962	polyribonucleotide nucleotidyltransferase [EC:2.7.7.8]
LOC_Os02g44780	K13789	geranylgeranyl diphosphate synthase, type II [EC:2.5.1.1 2.5.1.10
LOC_Os02g07230	K01749	hydroxymethylbilane synthase [EC:2.5.1.61]
LOC_Os11g36050	K09549	prefoldin subunit 2
LOC_Os03g43020	K09550	prefoldin subunit 4
LOC_Os02g14860	K04798	prefoldin beta subunit
LOC_Os02g39050	K12870	pre-mRNA-splicing factor ISY1
LOC_Os08g03390	K12819	pre-mRNA-processing factor SLU7
LOC_Os01g21820	K03070	preprotein translocase subunit SecA
LOC_Os06g05880	K05759	profilin
LOC_Os05g05740	K06997
LOC_Os07g07060	K01881	prolyl-tRNA synthetase [EC:6.1.1.15]
LOC_Os07g36420	K06700	proteasome inhibitor subunit 1 (PI31)
LOC_Os03g10120	K12178	COP9 signalosome complex subunit 4
LOC_Os07g30840	K12180	COP9 signalosome complex subunit 7
LOC_Os03g11570	K03039	26S proteasome regulatory subunit N9
LOC_Os08g44280	K00573	protein-L-isoaspartate(D-aspartate) O-methyltransferase
LOC_Os04g58200	K00218	protochlorophyllide reductase [EC:1.3.1.33]
LOC_Os01g18320	K00231	protoporphyrinogen oxidase [EC:1.3.3.4]
LOC_Os07g04840	K02717	photosystem II oxygen-evolving enhancer protein 2
LOC_Os02g58090	K12829	splicing factor 3B subunit 2
LOC_Os12g21890	K01110	phosphatidylinositol-3,4,5-trisphosphate 3-phosphatase [EC:3.1.3.67]
LOC_Os02g12650	K08776	puromycin-sensitive aminopeptidase [EC:3.4.11.-]
LOC_Os08g30810	K08776	puromycin-sensitive aminopeptidase [EC:3.4.11.-]
LOC_Os02g24354	K01586	diaminopimelate decarboxylase [EC:4.1.1.20]
LOC_Os06g22060	K00895	pyrophosphate--fructose-6-phosphate 1-phosphotransferase
LOC_Os06g13810	K00895	pyrophosphate--fructose-6-phosphate 1-phosphotransferase
LOC_Os04g58110	K00873	pyruvate kinase [EC:2.7.1.40]
LOC_Os10g42100	K00873	pyruvate kinase [EC:2.7.1.40]
LOC_Os01g16960	K00873	pyruvate kinase [EC:2.7.1.40]
LOC_Os06g15360	K10839	UV excision repair protein RAD23
LOC_Os06g35814	K07976	Rab family, other
LOC_Os10g23100	K07976	Rab family, other
LOC_Os05g49890	K07936	GTP-binding nuclear protein Ran
LOC_Os05g44050	K07897	Ras-related protein Rab-7A
LOC_Os05g01480	K07976	Rab family, other
LOC_Os02g37420	K07976	Rab family, other
LOC_Os01g12730	K07976	Rab family, other
LOC_Os07g44040	K07976	Rab family, other
LOC_Os02g52450	K02553	regulator of ribonuclease activity A
LOC_Os05g04630	K08245	phytepsin [EC:3.4.23.40]
LOC_Os10g34380	K12824	transcription elongation regulator 1
LOC_Os05g05860	K03006	DNA-directed RNA polymerase II subunit A [EC:2.7.7.6]
LOC_Os12g41500	K01011	thiosulfate/3-mercaptopyruvate sulfurtransferase [EC:2.8.1.1
LOC_Os12g35580	K00793	riboflavin synthase alpha chain [EC:2.5.1.9]
LOC_Os08g33710	K01166	ribonuclease T2 [EC:3.1.27.1]
LOC_Os07g08030	K01807	ribose 5-phosphate isomerase A [EC:5.3.1.6]
LOC_Os04g24140	K01807	ribose 5-phosphate isomerase A [EC:5.3.1.6]
LOC_Os01g67134	K02932	large subunit ribosomal protein L5e
LOC_Os03g61260	K02881	large subunit ribosomal protein L18
LOC_Os02g57670	K02939	large subunit ribosomal protein L9
LOC_Os03g17580	K02864	large subunit ribosomal protein L10
LOC_Os01g54540	K02871	large subunit ribosomal protein L13
LOC_Os06g02510	K02873	large subunit ribosomal protein L13e
LOC_Os07g01870	K02872	large subunit ribosomal protein L13Ae
LOC_Os09g08430	K02880	large subunit ribosomal protein L17e
LOC_Os08g41810	K02880	large subunit ribosomal protein L17e
LOC_Os06g46930	K02895	large subunit ribosomal protein L24
LOC_Os01g69950	K02899	large subunit ribosomal protein L27
LOC_Os02g51790	K02904	large subunit ribosomal protein L29
LOC_Os02g04460	K02906	large subunit ribosomal protein L3
LOC_Os07g08330	K02930	large subunit ribosomal protein L4e
LOC_Os03g15870	K02926	large subunit ribosomal protein L4
LOC_Os03g03360	K02931	large subunit ribosomal protein L5
LOC_Os09g31180	K02940	large subunit ribosomal protein L9e
LOC_Os02g01332	K02940	large subunit ribosomal protein L9e
LOC_Os01g16890	K02908	large subunit ribosomal protein L30e
LOC_Os03g49710	K02952	small subunit ribosomal protein S13
LOC_Os03g59310	K02981	small subunit ribosomal protein S2e
LOC_Os04g28180	K02995	small subunit ribosomal protein S8e
LOC_Os07g10660	K02981	small subunit ribosomal protein S2e
LOC_Os03g34040	K02988	small subunit ribosomal protein S5
LOC_Os11g11390	K02866	large subunit ribosomal protein L10e
LOC_Os03g55930	K02996	small subunit ribosomal protein S9
LOC_Os07g38300	K02838	ribosome recycling factor
LOC_Os04g41300	K02838	ribosome recycling factor
LOC_Os02g05830	K01602	ribulose-bisphosphate carboxylase small chain [EC:4.1.1.39]
LOC_Os04g42010	K11090	lupus La protein
LOC_Os07g07610	K03008	DNA-directed RNA polymerase II subunit J
LOC_Os02g12850	K12741	heterogeneous nuclear ribonucleoprotein A1/A3
LOC_Os02g54700	K03248	translation initiation factor eIF-3 subunit 4
LOC_Os05g04850	K12876	RNA-binding protein 8A
LOC_Os02g39890	K12883	nuclear cap-binding protein subunit 2
LOC_Os03g59710	K12833	pre-mRNA branch site protein p14
LOC_Os02g07070	K13094	RNA-binding protein 5/10
LOC_Os02g42230	K10739	replication factor A2
LOC_Os06g08770	K11338	RuvB-like protein 2 [EC:3.6.1.-]
LOC_Os03g20100	K02945	small subunit ribosomal protein S1
LOC_Os03g14530	K02969	small subunit ribosomal protein S20e
LOC_Os05g04510	K00789	S-adenosylmethionine synthetase [EC:2.5.1.6]
LOC_Os02g30730	K11984	U4/U6.U5 tri-snRNP-associated protein 1
LOC_Os09g20430	K07152
LOC_Os08g22864	K06111	exocyst complex component 4
LOC_Os03g42110	K00145	N-acetyl-gamma-glutamyl-phosphate/N-acetyl-gamma-aminoadipyl-phospha
LOC_Os03g55280	K00133	aspartate-semialdehyde dehydrogenase [EC:1.2.1.11]
LOC_Os06g01690	K03609	septum site-determining protein MinD
LOC_Os02g16550	K07095
LOC_Os03g52840	K00600	glycine hydroxymethyltransferase [EC:2.1.2.1]
LOC_Os12g22030	K00600	glycine hydroxymethyltransferase [EC:2.1.2.1]
LOC_Os11g26860	K00600	glycine hydroxymethyltransferase [EC:2.1.2.1]
LOC_Os04g46930	K12235	serine racemase [EC:5.1.1.18]
LOC_Os02g13110	K04354	protein phosphatase 2 (formerly 2A), regulatory subunit B
LOC_Os05g11550	K04460	protein phosphatase 5 [EC:3.1.3.16]
LOC_Os05g05240	K01090	protein phosphatase [EC:3.1.3.16]
LOC_Os11g39670	K01875	seryl-tRNA synthetase [EC:6.1.1.11]
LOC_Os01g71300	K01070	S-formylglutathione hydrolase [EC:3.1.2.12]
LOC_Os01g55270	K04507	calcyclin binding protein
LOC_Os04g36859	K12947	signal peptidase complex subunit 2 [EC:3.4.-.-]
LOC_Os06g23430	K03105	signal recognition particle subunit SRP19
LOC_Os03g03990	K12271	signal recognition particle 43 kDa protein
LOC_Os01g66560	K03108	signal recognition particle subunit SRP72
LOC_Os08g41250	K12272	signal recognition particle receptor subunit beta
LOC_Os01g45530	K03111	single-strand DNA-binding protein
LOC_Os02g52250	K06063	SNW domain-containing protein 1
LOC_Os09g36830	K03094	S-phase kinase-associated protein 1
LOC_Os05g48020	K08506	syntaxin of plants SYP7
LOC_Os08g17600	K08503	syntaxin of plants SYP5
LOC_Os06g43590	K12197	charged multivesicular body protein 1
LOC_Os06g40620	K12194	charged multivesicular body protein 4
LOC_Os02g38300	K12195	charged multivesicular body protein 6
LOC_Os03g01810	K12193	charged multivesicular body protein 3
LOC_Os09g09480	K12194	charged multivesicular body protein 4
LOC_Os05g36260	K01507	inorganic pyrophosphatase [EC:3.6.1.1]
LOC_Os02g47600	K01507	inorganic pyrophosphatase [EC:3.6.1.1]
LOC_Os07g22600	K00797	spermidine synthase [EC:2.5.1.16]
LOC_Os06g33710	K00797	spermidine synthase [EC:2.5.1.16]
LOC_Os03g15700	K12826	splicing factor 3A subunit 2
LOC_Os05g48960	K12836	splicing factor U2AF 35 kDa subunit
LOC_Os07g22930	K13679	granule-bound starch synthase [EC:2.4.1.242]
LOC_Os02g54600	K13413	mitogen-activated protein kinase kinase 4/5, plant [EC:2.7.12.2]
LOC_Os03g27320	K13484	5-hydroxyisourate hydrolase /
LOC_Os04g04254	K05841	sterol 3beta-glucosyltransferase [EC:2.4.1.173]
LOC_Os08g41910	K07566	putative translation factor
LOC_Os07g04240	K00234	succinate dehydrogenase (ubiquinone) flavoprotein subunit
LOC_Os08g02640	K00235	succinate dehydrogenase (ubiquinone) iron-sulfur protein
LOC_Os02g40830	K01900	succinyl-CoA synthetase beta subunit [EC:6.2.1.4 6.2.1.5]
LOC_Os07g38970	K01899	succinyl-CoA synthetase alpha subunit [EC:6.2.1.4 6.2.1.5]
LOC_Os06g09450	K00695	sucrose synthase [EC:2.4.1.13]
LOC_Os08g20660	K00696	sucrose-phosphate synthase [EC:2.4.1.14]
LOC_Os07g39780	K10685	ubiquitin-like 1-activating enzyme E1 B [EC:6.3.2.19]
LOC_Os05g25850	K04564	superoxide dismutase, Fe-Mn family [EC:1.15.1.1]
LOC_Os01g43540	K12795	suppressor of G2 allele of SKP1
LOC_Os06g29400	K13123	G patch domain-containing protein 1
LOC_Os11g08080	K11649	SWI/SNF related-matrix-associated actin-dependent regulator of
LOC_Os07g07000	K08486	syntaxin 1B/2/3
LOC_Os10g32550	K04077	chaperonin GroEL
LOC_Os03g04970	K04077	chaperonin GroEL
LOC_Os02g01280	K04077	chaperonin GroEL
LOC_Os05g05470	K09498	T-complex protein 1 subunit zeta
LOC_Os04g46620	K09493	T-complex protein 1 subunit alpha
LOC_Os02g22780	K09496	T-complex protein 1 subunit delta
LOC_Os03g42220	K09494	T-complex protein 1 subunit beta
LOC_Os06g47320	K09499	T-complex protein 1 subunit eta
LOC_Os06g36700	K09497	T-complex protein 1 subunit epsilon
LOC_Os02g14929	K09495	T-complex protein 1 subunit gamma
LOC_Os02g01030	K09560	suppressor of tumorigenicity protein 13
LOC_Os03g47610	K03147	thiamine biosynthesis protein ThiC
LOC_Os01g32080	K12261	2-hydroxyacyl-CoA lyase 1 [EC:4.1.-.-]
LOC_Os11g30410	K10684	ubiquitin-like 1-activating enzyme E1 A [EC:6.3.2.19]
LOC_Os02g48290	K00384	thioredoxin reductase (NADPH) [EC:1.8.1.9]
LOC_Os08g06360	K13176	THO complex subunit 7
LOC_Os03g50510	K01754	threonine dehydratase [EC:4.3.1.19]
LOC_Os05g47640	K01733	threonine synthase [EC:4.2.3.1]
LOC_Os01g49890	K01733	threonine synthase [EC:4.2.3.1]
LOC_Os07g44630	K00943	dTMP kinase [EC:2.7.4.9]
LOC_Os02g17650	K09834	tocopherol cyclase
LOC_Os01g70170	K00616	transaldolase [EC:2.2.1.2]
LOC_Os08g05830	K00616	transaldolase [EC:2.2.1.2]
LOC_Os10g34180	K01527	nascent polypeptide-associated complex subunit beta
LOC_Os03g63400	K01527	nascent polypeptide-associated complex subunit beta
LOC_Os05g43450	K03139	transcription initiation factor TFIIF beta subunit
LOC_Os10g10990	K03138	transcription initiation factor TFIIF alpha subunit
LOC_Os08g25460	K03136	transcription initiation factor TFIIE alpha subunit
LOC_Os02g39850	K13065	shikimate O-hydroxycinnamoyltransferase [EC:2.3.1.133]
LOC_Os04g42250	K13065	shikimate O-hydroxycinnamoyltransferase [EC:2.3.1.133]
LOC_Os06g04270	K00615	transketolase [EC:2.2.1.1]
LOC_Os04g19740	K00615	transketolase [EC:2.2.1.1]
LOC_Os08g42410	K00162	pyruvate dehydrogenase E1 component subunit beta [EC:1.2.4.1]
LOC_Os12g42230	K00162	pyruvate dehydrogenase E1 component subunit beta [EC:1.2.4.1]
LOC_Os05g33840	K01662	1-deoxy-D-xylulose-5-phosphate synthase [EC:2.2.1.7]
LOC_Os07g07470	K00167	2-oxoisovalerate dehydrogenase E1 component, beta subunit
LOC_Os02g56740	K03240	translation initiation factor eIF-2B epsilon subunit
LOC_Os02g02990	K03245	translation initiation factor eIF-3 subunit 1
LOC_Os01g21180	K07575	PUA domain protein
LOC_Os04g59494	K02961	small subunit ribosomal protein S17
LOC_Os03g50090	K12858	ATP-dependent RNA helicase DDX23/PRP28 [EC:3.6.4.13]
LOC_Os10g02630	K11093	U1 small nuclear ribonucleoprotein 70kDa
LOC_Os05g46780	K13108	smad nuclear-interacting protein 1
LOC_Os09g36450	K01803	triosephosphate isomerase (TIM) [EC:5.3.1.1]
LOC_Os01g62420	K01803	triosephosphate isomerase (TIM) [EC:5.3.1.1]
LOC_Os02g44810	K06173	tRNA pseudouridine synthase A [EC:5.4.99.12]
LOC_Os08g42560	K01880	glycyl-tRNA synthetase [EC:6.1.1.14]
LOC_Os05g05840	K01892	histidyl-tRNA synthetase [EC:6.1.1.21]
LOC_Os12g35570	K01867	tryptophanyl-tRNA synthetase [EC:6.1.1.2]
LOC_Os02g46130	K01876	aspartyl-tRNA synthetase [EC:6.1.1.12]
LOC_Os03g38980	K04567	lysyl-tRNA synthetase, class II [EC:6.1.1.6]
LOC_Os02g04700	K01876	aspartyl-tRNA synthetase [EC:6.1.1.12]
LOC_Os02g41470	K04567	lysyl-tRNA synthetase, class II [EC:6.1.1.6]
LOC_Os08g04180	K01696	tryptophan synthase beta chain [EC:4.2.1.20]
LOC_Os03g56810	K07375	tubulin beta
LOC_Os01g59150	K07375	tubulin beta
LOC_Os05g34170	K07375	tubulin beta
LOC_Os03g01530	K07375	tubulin beta
LOC_Os01g18050	K07375	tubulin beta
LOC_Os03g45920	K07375	tubulin beta
LOC_Os03g51600	K07374	tubulin alpha
LOC_Os11g14220	K07374	tubulin alpha
LOC_Os07g38730	K07374	tubulin alpha
LOC_Os04g56970	K03531	cell division protein FtsZ
LOC_Os03g44420	K03531	cell division protein FtsZ
LOC_Os05g06450	K10389	tubulin gamma
LOC_Os03g55784	K11876	proteasome assembly chaperone 2
LOC_Os02g58640	K12183	ESCRT-I complex subunit TSG101
LOC_Os02g13990	K11092	U2 small nuclear ribonucleoprotein A'
LOC_Os01g36930	K11843	ubiquitin carboxyl-terminal hydrolase 14 [EC:3.1.2.15]
LOC_Os07g46660	K11841	ubiquitin carboxyl-terminal hydrolase 10 [EC:3.1.2.15]
LOC_Os02g43760	K05609	ubiquitin carboxyl-terminal hydrolase L3 [EC:3.4.19.12]
LOC_Os12g30540	K11838	ubiquitin carboxyl-terminal hydrolase 7 [EC:3.1.2.15]
LOC_Os07g06950	K11838	ubiquitin carboxyl-terminal hydrolase 7 [EC:3.1.2.15]
LOC_Os02g10510	K11885	DNA damage-inducible protein 1
LOC_Os10g39620	K04523	ubiquilin
LOC_Os02g08480	K14016	ubiquitin fusion degradation protein 1
LOC_Os11g01510	K03178	ubiquitin-activating enzyme E1 [EC:6.3.2.19]
LOC_Os07g49230	K03178	ubiquitin-activating enzyme E1 [EC:6.3.2.19]
LOC_Os01g70140	K04649	ubiquitin-conjugating enzyme (huntingtin interacting protein 2)
LOC_Os09g12570	K10704	ubiquitin-conjugating enzyme E2 variant
LOC_Os12g41220	K10704	ubiquitin-conjugating enzyme E2 variant
LOC_Os01g48280	K10580	ubiquitin-conjugating enzyme E2 N [EC:6.3.2.19]
LOC_Os10g31000	K10576	ubiquitin-conjugating enzyme E2 H [EC:6.3.2.19]
LOC_Os03g50440	K10704	ubiquitin-conjugating enzyme E2 variant
LOC_Os12g25690	K00012	UDPglucose 6-dehydrogenase [EC:1.1.1.22]
LOC_Os03g55070	K00012	UDPglucose 6-dehydrogenase [EC:1.1.1.22]
LOC_Os12g25700	K00012	UDPglucose 6-dehydrogenase [EC:1.1.1.22]
LOC_Os03g31210	K00012	UDPglucose 6-dehydrogenase [EC:1.1.1.22]
LOC_Os10g13800	K12165	ufm1-conjugating enzyme 1
LOC_Os01g64520	K00365	urate oxidase [EC:1.7.3.3]
LOC_Os02g02560	K00963	UTP--glucose-1-phosphate uridylyltransferase [EC:2.7.7.9]
LOC_Os04g52370	K00972	UDP-N-acetylglucosamine pyrophosphorylase [EC:2.7.7.23]
LOC_Os08g10600	K00972	UDP-N-acetylglucosamine pyrophosphorylase [EC:2.7.7.23]
LOC_Os06g48760	K12447	UDP-sugar pyrophosphorylase [EC:2.7.7.64]
LOC_Os05g51530	K02148	V-type H+-transporting ATPase subunit C [EC:3.6.3.14]
LOC_Os04g55040	K02149	V-type H+-transporting ATPase subunit D [EC:3.6.3.14]
LOC_Os01g40470	K02146	V-type H+-transporting ATPase subunit AC39 [EC:3.6.3.14]
LOC_Os01g46980	K02150	V-type H+-transporting ATPase subunit E [EC:3.6.3.14]
LOC_Os01g12260	K02150	V-type H+-transporting ATPase subunit E [EC:3.6.3.14]
LOC_Os10g35250	K12200	programmed cell death 6-interacting protein
LOC_Os04g45470	K01369	legumain [EC:3.4.22.34]
LOC_Os08g34140	K08495	golgi SNAP receptor complex member 1
LOC_Os01g51120	K08493	vesicle transport through interaction with t-SNAREs 1
LOC_Os01g37980	K08493	vesicle transport through interaction with t-SNAREs 1
LOC_Os02g03450	K08495	golgi SNAP receptor complex member 1
LOC_Os03g45260	K08496	golgi SNAP receptor complex member 2
LOC_Os06g07780	K08515	vesicle-associated membrane protein 7
LOC_Os10g06540	K08515	vesicle-associated membrane protein 7
LOC_Os05g44310	K06027	vesicle-fusing ATPase [EC:3.6.4.6]
LOC_Os07g46370	K14005	protein transport protein SEC31
LOC_Os08g21660	K03246	translation initiation factor eIF-3 subunit 2
LOC_Os01g51300	K10752	histone-binding protein RBBP4
LOC_Os10g32880	K10599	pre-mRNA-processing factor 19 [EC:6.3.2.19]
LOC_Os06g39760	K13137	serine-threonine kinase receptor-associated protein
LOC_Os07g03160	K14018	phospholipase A-2-activating protein
LOC_Os02g49090	K12616	enhancer of mRNA-decapping protein 4
LOC_Os11g43890	K12602	WD repeat-containing protein 61
LOC_Os03g43890	K10752	histone-binding protein RBBP4
LOC_Os01g21940	K13111	WD40 repeat-containing protein SMU1
LOC_Os06g44370	K12857	Prp8 binding protein
LOC_Os09g36480	K13119	protein FAM50
LOC_Os07g47290	K01805	xylose isomerase [EC:5.3.1.5]
LOC_Os07g10490	K00514	zeta-carotene desaturase [EC:1.14.99.30]
LOC_Os08g36774	K06874
LOC_Os12g31840	K09506	DnaJ homolog subfamily A member 5
LOC_Os03g61640	K12848	U4/U6.U5 tri-snRNP component SNU23
LOC_Os10g37110	K00517
LOC_Os04g21660	K03065	26S proteasome regulatory subunit T5
LOC_Os06g39870	K03066	26S proteasome regulatory subunit T6
LOC_Os03g27230	K01626	3-deoxy-7-phosphoheptulonate synthase [EC:2.5.1.54]
LOC_Os02g07160	K00457	4-hydroxyphenylpyruvate dioxygenase [EC:1.13.11.27]
LOC_Os08g43370	K01057	6-phosphogluconolactonase [EC:3.1.1.31]
LOC_Os07g41280	K01057	6-phosphogluconolactonase [EC:3.1.1.31]
LOC_Os09g07830	K00626	acetyl-CoA C-acetyltransferase [EC:2.3.1.9]
LOC_Os11g41650	K00860	adenylylsulfate kinase [EC:2.7.1.25]
LOC_Os08g15040	K07942	ADP-ribosylation factor-like 1
LOC_Os11g32260	K01191	alpha-mannosidase [EC:3.2.1.24]
LOC_Os10g42940	K07977	Arf/Sar family, other
LOC_Os03g19280	K01755	argininosuccinate lyase [EC:4.3.2.1]
LOC_Os02g32520	K03696	ATP-dependent Clp protease ATP-binding subunit ClpC
LOC_Os03g59264	K08057	calreticulin
LOC_Os02g47850	K01956	carbamoyl-phosphate synthase small subunit [EC:6.3.5.5]
LOC_Os12g15470	K01287	carboxypeptidase C [EC:3.4.16.5]
LOC_Os02g02400	K03781	catalase [EC:1.11.1.6]
LOC_Os03g33580	K02180	cell cycle arrest protein BUB3
LOC_Os03g46640	K01520	dUTP pyrophosphatase [EC:3.6.1.23]
LOC_Os08g02700	K01623	fructose-bisphosphate aldolase, class I [EC:4.1.2.13]
LOC_Os08g25734	K00975	glucose-1-phosphate adenylyltransferase [EC:2.7.7.27]
LOC_Os01g44220	K00975	glucose-1-phosphate adenylyltransferase [EC:2.7.7.27]
LOC_Os03g01120	K01535	H+-transporting ATPase [EC:3.6.3.6]
LOC_Os05g38530	K03283	heat shock 70kDa protein 1/8
LOC_Os12g14070	K03283	heat shock 70kDa protein 1/8
LOC_Os05g45590	K00844	hexokinase [EC:2.7.1.1]
LOC_Os11g04950	K13109	IK cytokine
LOC_Os02g21660	K02865	large subunit ribosomal protein L10Ae
LOC_Os05g07700	K02866	large subunit ribosomal protein L10e
LOC_Os08g01859	K02907	large subunit ribosomal protein L30
LOC_Os08g03640	K02941	large subunit ribosomal protein LP0
LOC_Os12g27070	K04082	molecular chaperone HscB
LOC_Os08g14570	K00327	NADPH-ferrihemoprotein reductase [EC:1.6.2.4]
LOC_Os02g58340	K01414	oligopeptidase A [EC:3.4.24.70]
LOC_Os03g21260	K01834	phosphoglycerate mutase [EC:5.4.2.1]
LOC_Os01g18630	K08245	phytepsin [EC:3.4.23.40]
LOC_Os02g04320	K14004	protein transport protein SEC13
LOC_Os01g06660	K01568	pyruvate decarboxylase [EC:4.1.1.1]
LOC_Os09g33500	K00162	pyruvate dehydrogenase E1 component subunit beta [EC:1.2.4.1]
LOC_Os05g33570	K01006	pyruvate,orthophosphate dikinase [EC:2.7.9.1]
LOC_Os08g41340	K07976	Rab family, other
LOC_Os03g60870	K07976	Rab family, other
LOC_Os01g54590	K07976	Rab family, other
LOC_Os01g62950	K07976	Rab family, other
LOC_Os01g08450	K07874	Ras-related protein Rab-1A
LOC_Os06g01370	K07466	replication factor A1
LOC_Os01g18860	K00789	S-adenosylmethionine synthetase [EC:2.5.1.6]
LOC_Os07g46440	K02996	small subunit ribosomal protein S9
LOC_Os10g31900	K12831	splicing factor 3B subunit 4
LOC_Os11g41820	K12837	splicing factor U2AF 65 kDa subunit
LOC_Os06g12450	K00703	starch synthase [EC:2.4.1.21]
LOC_Os06g22140	K00384	thioredoxin reductase (NADPH) [EC:1.8.1.9]
LOC_Os05g28010	K03132	transcription initiation factor TFIID subunit D6
LOC_Os07g02210	K03263	translation initiation factor eIF-5A
LOC_Os06g12990	K03439	tRNA (guanine-N7-)-methyltransferase [EC:2.1.1.33]
LOC_Os03g40720	K00012	UDPglucose 6-dehydrogenase [EC:1.1.1.22]
LOC_Os09g24200	K10839	UV excision repair protein RAD23
Proteins identified with at least two unique peptides in both Experiment 2 and Experiment 3 were used for Kegg Ontology (KO) analysis. The KO analysis was conducted with a online KO analysis tool provided by the Rice Oligonucleotide Array Database (http://www.ricearray.org/index.shtml).

## Sheet: Secondary metabolite biosyn
Table S4. KEGG ontology of identified proteins in the elongating internode. KEGG terms and identified proteins involved in the biosynthesis of secondary metabolites (pathway entry: osa01110)
KO ID	KO definition	Protein identified
K00001	E1.1.1.1; alcohol dehydrogenase [EC:1.1.1.1]	1
K00012	UDPglucose 6-dehydrogenase [EC:1.1.1.22]	1
K00013	hisD; histidinol dehydrogenase [EC:1.1.1.23]	1
K00025	MDH1; malate dehydrogenase [EC:1.1.1.37]	1
K00026	MDH2; malate dehydrogenase [EC:1.1.1.37]	6
K00030	IDH3; isocitrate dehydrogenase (NAD+) [EC:1.1.1.41]	3
K00031	IDH1; isocitrate dehydrogenase [EC:1.1.1.42]	4
K00033	PGD; 6-phosphogluconate dehydrogenase [EC:1.1.1.44 1.1.1.343]	2
K00036	G6PD; glucose-6-phosphate 1-dehydrogenase [EC:1.1.1.49 1.1.1.363]	3
K00052	leuB; 3-isopropylmalate dehydrogenase [EC:1.1.1.85]	1
K00053	ilvC; ketol-acid reductoisomerase [EC:1.1.1.86]	1
K00083	E1.1.1.195; cinnamyl-alcohol dehydrogenase [EC:1.1.1.195]	2
K00088	IMPDH; IMP dehydrogenase [EC:1.1.1.205]	1
K00099	dxr; 1-deoxy-D-xylulose-5-phosphate reductoisomerase [EC:1.1.1.267]	1
K00121	frmA; S-(hydroxymethyl)glutathione dehydrogenase / alcohol dehydrogenase [EC:1.1.1.284 1.1.1.1]	1
K00128	ALDH; aldehyde dehydrogenase (NAD+) [EC:1.2.1.3]	3
K00133	asd; aspartate-semialdehyde dehydrogenase [EC:1.2.1.11]	1
K00134	GAPDH; glyceraldehyde 3-phosphate dehydrogenase [EC:1.2.1.12]	5
K00145	argC; N-acetyl-gamma-glutamyl-phosphate reductase [EC:1.2.1.38]	1
K00161	PDHA; pyruvate dehydrogenase E1 component alpha subunit [EC:1.2.4.1]	3
K00162	PDHB; pyruvate dehydrogenase E1 component beta subunit [EC:1.2.4.1]	3
K00164	OGDH; 2-oxoglutarate dehydrogenase E1 component [EC:1.2.4.2]	2
K00167	BCKDHB; 2-oxoisovalerate dehydrogenase E1 component beta subunit [EC:1.2.4.4]	1
K00218	por; protochlorophyllide reductase [EC:1.3.1.33]	2
K00225	GLDH; L-galactono-1,4-lactone dehydrogenase [EC:1.3.2.3]	1
K00228	CPOX; coproporphyrinogen III oxidase [EC:1.3.3.3]	1
K00231	PPOX; protoporphyrinogen/coproporphyrinogen III oxidase [EC:1.3.3.4 1.3.3.15]	1
K00232	E1.3.3.6; acyl-CoA oxidase [EC:1.3.3.6]	1
K00234	SDHA; succinate dehydrogenase (ubiquinone) flavoprotein subunit [EC:1.3.5.1]	1
K00235	SDHB; succinate dehydrogenase (ubiquinone) iron-sulfur subunit [EC:1.3.5.1]	1
K00249	ACADM; acyl-CoA dehydrogenase [EC:1.3.8.7]	1
K00281	GLDC; glycine dehydrogenase [EC:1.4.4.2]	1
K00382	DLD; dihydrolipoamide dehydrogenase [EC:1.8.1.4]	2
K00430	E1.11.1.7; peroxidase [EC:1.11.1.7]	5
K00454	LOX2S; lipoxygenase [EC:1.13.11.12]	1
K00457	4-hydroxyphenylpyruvate dioxygenase [EC:1.13.11.27]	1
K00487	CYP73A; trans-cinnamate 4-monooxygenase [EC:1.14.13.11]	1
K00510	HMOX; heme oxygenase (biliverdin-producing) [EC:1.14.14.18]	1
K00514	ZDS; zeta-carotene desaturase [EC:1.3.5.6]	1
K00517	E1.14.-.-	1
K00549	metE; 5-methyltetrahydropteroyltriglutamate--homocysteine methyltransferase [EC:2.1.1.14]	1
K00559	E2.1.1.41; sterol 24-C-methyltransferase [EC:2.1.1.41]	1
K00588	E2.1.1.104; caffeoyl-CoA O-methyltransferase [EC:2.1.1.104]	1
K00600	glyA; glycine hydroxymethyltransferase [EC:2.1.2.1]	3
K00605	gcvT; aminomethyltransferase [EC:2.1.2.10]	1
K00615	E2.2.1.1; transketolase [EC:2.2.1.1]	2
K00616	E2.2.1.2; transaldolase [EC:2.2.1.2]	2
K00620	argJ; glutamate N-acetyltransferase / amino-acid N-acetyltransferase [EC:2.3.1.35 2.3.1.1]	1
K00626	E2.3.1.9; acetyl-CoA C-acetyltransferase [EC:2.3.1.9]	2
K00627	DLAT; pyruvate dehydrogenase E2 component (dihydrolipoamide acetyltransferase) [EC:2.3.1.12]	5
K00660	CHS; chalcone synthase [EC:2.3.1.74]	1
K00688	PYG; glycogen phosphorylase [EC:2.4.1.1]	2
K00703	starch synthase [EC:2.4.1.21]	1
K00765	hisG; ATP phosphoribosyltransferase [EC:2.4.2.17]	1
K00766	trpD; anthranilate phosphoribosyltransferase [EC:2.4.2.18]	1
K00789	metK; S-adenosylmethionine synthetase [EC:2.5.1.6]	2
K00793	ribE; riboflavin synthase [EC:2.5.1.9]	1
K00794	ribH; 6,7-dimethyl-8-ribityllumazine synthase [EC:2.5.1.78]	1
K00800	aroA; 3-phosphoshikimate 1-carboxyvinyltransferase [EC:2.5.1.19]	1
K00817	hisC; histidinol-phosphate aminotransferase [EC:2.6.1.9]	1
K00819	rocD; ornithine--oxo-acid transaminase [EC:2.6.1.13]	1
K00827	AGXT2; alanine-glyoxylate transaminase / (R)-3-amino-2-methylpropionate-pyruvate transaminase [EC:2.6.1.44 2.6.1.40]	3
K00844	HK; hexokinase [EC:2.7.1.1]	3
K00850	pfkA; 6-phosphofructokinase 1 [EC:2.7.1.11]	1
K00860	adenylylsulfate kinase [EC:2.7.1.25]	1
K00872	thrB1; homoserine kinase [EC:2.7.1.39]	1
K00873	PK; pyruvate kinase [EC:2.7.1.40]	3
K00895	pfp; diphosphate-dependent phosphofructokinase [EC:2.7.1.90]	2
K00919	ispE; 4-diphosphocytidyl-2-C-methyl-D-erythritol kinase [EC:2.7.1.148]	1
K00927	PGK; phosphoglycerate kinase [EC:2.7.2.3]	2
K00930	argB; acetylglutamate kinase [EC:2.7.2.8]	1
K00940	ndk; nucleoside-diphosphate kinase [EC:2.7.4.6]	4
K00948	PRPS; ribose-phosphate pyrophosphokinase [EC:2.7.6.1]	1
K00975	glgC; glucose-1-phosphate adenylyltransferase [EC:2.7.7.27]	4
K01006	pyruvate,orthophosphate dikinase [EC:2.7.9.1]	1
K01057	PGLS; 6-phosphogluconolactonase [EC:3.1.1.31]	3
K01115	PLD1_2; phospholipase D1/2 [EC:3.1.4.4]	2
K01438	argE; acetylornithine deacetylase [EC:3.5.1.16]	1
K01520	dUTP pyrophosphatase [EC:3.6.1.23]	1
K01568	pyruvate decarboxylase [EC:4.1.1.1]	1
K01580	E4.1.1.15; glutamate decarboxylase [EC:4.1.1.15]	3
K01586	lysA; diaminopimelate decarboxylase [EC:4.1.1.20]	1
K01609	trpC; indole-3-glycerol phosphate synthase [EC:4.1.1.48]	2
K01623	ALDO; fructose-bisphosphate aldolase, class I [EC:4.1.2.13]	5
K01626	E2.5.1.54; 3-deoxy-7-phosphoheptulonate synthase [EC:2.5.1.54]	3
K01647	CS; citrate synthase [EC:2.3.3.1]	1
K01648	ACLY; ATP citrate (pro-S)-lyase [EC:2.3.3.8]	2
K01653	E2.2.1.6S; acetolactate synthase I/III small subunit [EC:2.2.1.6]	1
K01657	trpE; anthranilate synthase component I [EC:4.1.3.27]	1
K01658	trpG; anthranilate synthase component II [EC:4.1.3.27]	2
K01661	menB; naphthoate synthase [EC:4.1.3.36]	1
K01662	dxs; 1-deoxy-D-xylulose-5-phosphate synthase [EC:2.2.1.7]	1
K01679	E4.2.1.2B; fumarate hydratase, class II [EC:4.2.1.2]	1
K01681	ACO; aconitate hydratase [EC:4.2.1.3]	1
K01687	ilvD; dihydroxy-acid dehydratase [EC:4.2.1.9]	1
K01689	ENO; enolase [EC:4.2.1.11]	4
K01696	trpB; tryptophan synthase beta chain [EC:4.2.1.20]	1
K01698	hemB; porphobilinogen synthase [EC:4.2.1.24]	1
K01703	leuC; 3-isopropylmalate/(R)-2-methylmalate dehydratase large subunit [EC:4.2.1.33 4.2.1.35]	1
K01704	leuD; 3-isopropylmalate/(R)-2-methylmalate dehydratase small subunit [EC:4.2.1.33 4.2.1.35]	1
K01733	thrC; threonine synthase [EC:4.2.3.1]	2
K01735	aroB; 3-dehydroquinate synthase [EC:4.2.3.4]	1
K01736	aroC; chorismate synthase [EC:4.2.3.5]	1
K01738	cysK; cysteine synthase A [EC:2.5.1.47]	2
K01749	hemC; hydroxymethylbilane synthase [EC:2.5.1.61]	1
K01754	E4.3.1.19; threonine dehydratase [EC:4.3.1.19]	1
K01755	argininosuccinate lyase [EC:4.3.2.1]	1
K01756	purB; adenylosuccinate lyase [EC:4.3.2.2]	1
K01785	galM; aldose 1-epimerase [EC:5.1.3.3]	1
K01792	E5.1.3.15; glucose-6-phosphate 1-epimerase [EC:5.1.3.15]	1
K01803	TPI; triosephosphate isomerase (TIM) [EC:5.3.1.1]	2
K01807	rpiA; ribose 5-phosphate isomerase A [EC:5.3.1.6]	2
K01810	GPI; glucose-6-phosphate isomerase [EC:5.3.1.9]	3
K01823	idi; isopentenyl-diphosphate Delta-isomerase [EC:5.3.3.2]	2
K01834	PGAM; 2,3-bisphosphoglycerate-dependent phosphoglycerate mutase [EC:5.4.2.11]	3
K01835	pgm; phosphoglucomutase [EC:5.4.2.2]	2
K01845	hemL; glutamate-1-semialdehyde 2,1-aminomutase [EC:5.4.3.8]	1
K01850	E5.4.99.5; chorismate mutase [EC:5.4.99.5]	2
K01859	E5.5.1.6; chalcone isomerase [EC:5.5.1.6]	1
K01895	ACSS; acetyl-CoA synthetase [EC:6.2.1.1]	2
K01899	LSC1; succinyl-CoA synthetase alpha subunit [EC:6.2.1.4 6.2.1.5]	1
K01900	LSC2; succinyl-CoA synthetase beta subunit [EC:6.2.1.4 6.2.1.5]	1
K01904	4CL; 4-coumarate--CoA ligase [EC:6.2.1.12]	2
K01923	purC; phosphoribosylaminoimidazole-succinocarboxamide synthase [EC:6.3.2.6]	1
K01933	purM; phosphoribosylformylglycinamidine cyclo-ligase [EC:6.3.3.1]	1
K01940	argG; argininosuccinate synthase [EC:6.3.4.5]	1
K01945	purD; phosphoribosylamine--glycine ligase [EC:6.3.4.13]	1
K01953	asnB; asparagine synthase (glutamine-hydrolysing) [EC:6.3.5.4]	2
K01956	carbamoyl-phosphate synthase small subunit [EC:6.3.5.5]	1
K02437	gcvH; glycine cleavage system H protein	3
K03404	chlD; magnesium chelatase subunit D [EC:6.6.1.1]	1
K03405	chlI; magnesium chelatase subunit I [EC:6.6.1.1]	1
K03428	bchM; magnesium-protoporphyrin O-methyltransferase [EC:2.1.1.11]	1
K03526	gcpE; (E)-4-hydroxy-3-methylbut-2-enyl-diphosphate synthase [EC:1.17.7.1 1.17.7.3]	1
K03527	ispH; 4-hydroxy-3-methylbut-2-en-1-yl diphosphate reductase [EC:1.17.7.4]	1
K03696	ATP-dependent Clp protease ATP-binding subunit ClpC	1
K03781	katE; catalase [EC:1.11.1.6]	2
K03787	surE; 5'-nucleotidase [EC:3.1.3.5]	2
K03809	wrbA; NAD(P)H dehydrogenase (quinone) [EC:1.6.5.2]	1
K03841	FBP; fructose-1,6-bisphosphatase I [EC:3.1.3.11]	1
K05894	OPR; 12-oxophytodienoic acid reductase [EC:1.3.1.42]	1
K05928	E2.1.1.95; tocopherol O-methyltransferase [EC:2.1.1.95]	1
K05933	E1.14.17.4; aminocyclopropanecarboxylate oxidase [EC:1.14.17.4]	2
K06443	lcyB; lycopene beta-cyclase [EC:5.5.1.19]	1
K07513	ACAA1; acetyl-CoA acyltransferase 1 [EC:2.3.1.16]	1
K09699	DBT; 2-oxoisovalerate dehydrogenase E2 component (dihydrolipoyl transacylase) [EC:2.3.1.168]	1
K09753	CCR; cinnamoyl-CoA reductase [EC:1.2.1.44]	1
K09754	CYP98A; coumaroylquinate(coumaroylshikimate) 3'-monooxygenase [EC:1.14.13.36]	1
K09834	VTE1; tocopherol cyclase [EC:5.5.1.24]	1
K09841	ABA2; xanthoxin dehydrogenase [EC:1.1.1.288]	1
K10046	GME; GDP-D-mannose 3', 5'-epimerase [EC:5.1.3.18 5.1.3.-]	1
K10047	VTC4; inositol-phosphate phosphatase / L-galactose 1-phosphate phosphatase [EC:3.1.3.25 3.1.3.93]	1
K10206	E2.6.1.83; LL-diaminopimelate aminotransferase [EC:2.6.1.83]	1
K10526	OPCL1; OPC-8:0 CoA ligase 1 [EC:6.2.1.-]	1
K10527	MFP2; enoyl-CoA hydratase/3-hydroxyacyl-CoA dehydrogenase [EC:4.2.1.17 1.1.1.35 1.1.1.211]	2
K10960	chlP; geranylgeranyl diphosphate/geranylgeranyl-bacteriochlorophyllide a reductase [EC:1.3.1.83 1.3.1.111]	1
K11517	HAO; (S)-2-hydroxy-acid oxidase [EC:1.1.3.15]	1
K11755	hisIE; phosphoribosyl-ATP pyrophosphohydrolase / phosphoribosyl-AMP cyclohydrolase [EC:3.6.1.31 3.5.4.19]	1
K11808	ADE2; phosphoribosylaminoimidazole carboxylase [EC:4.1.1.21]	1
K12657	ALDH18A1; delta-1-pyrroline-5-carboxylate synthetase [EC:2.7.2.11 1.2.1.41]	2
K13034	ATCYSC1; L-3-cyanoalanine synthase/ cysteine synthase [EC:2.5.1.47 4.4.1.9]	1
K13035	NIT4; beta-cyano-L-alanine hydratase/nitrilase [EC:3.5.5.4 4.2.1.65]	1
K13064	PTAL; phenylalanine/tyrosine ammonia-lyase [EC:4.3.1.25]	1
K13065	E2.3.1.133; shikimate O-hydroxycinnamoyltransferase [EC:2.3.1.133]	2
K13679	WAXY; granule-bound starch synthase [EC:2.4.1.242]	1
K13789	GGPS; geranylgeranyl diphosphate synthase, type II [EC:2.5.1.1 2.5.1.10 2.5.1.29]	1
K14085	ALDH7A1; aldehyde dehydrogenase family 7 member A1 [EC:1.2.1.31 1.2.1.8 1.2.1.3]	1
	Total	262
